# Supplementary material
Source: PubMed Central journal article supplement (PMC2532695)
Supplement: NIHMS64093-supplement-1si20051209_12.pdf [file NIHMS64093-supplement-1si20051209_12.pdf]

## Supporting Information

### Direct Asymmetric *anti*-Mannich-Type Reactions Catalyzed by a Designed Amino Acid

Susumu Mitsumori,<sup>†</sup> Haile Zhang,<sup>†</sup> Paul Ha-Yeon Cheong,<sup>§</sup> K. N. Houk,<sup>\*§</sup> Fujie Tanaka,<sup>\*†</sup> and Carlos, F. Barbas, III<sup>\*†</sup>

<sup>†</sup> The Skaggs Institute for Chemical Biology and the Departments of Chemistry and Molecular Biology, The Scripps Research Institute, 10550 North Torrey Pines Road, La Jolla, California 92037

<sup>§</sup> Department of Chemistry and Biochemistry, University of California, Los Angeles, California 90095-1569

**General:** Moisture sensitive reactions were carried out under an argon atmosphere. For thin layer chromatography (TLC), silica gel plates VWR GL60 F254 were used and compounds were visualized by irradiation with UV light and/or by treatment with a solution of phosphomolybdic acid (25 g), Ce(SO<sub>4</sub>)<sub>2</sub>•H<sub>2</sub>O (10 g), and conc. H<sub>2</sub>SO<sub>4</sub> (60 mL) in H<sub>2</sub>O (940 mL) followed by heating or by treatment with a solution of *p*-anisaldehyde (23 mL), conc. H<sub>2</sub>SO<sub>4</sub> (35 mL), and acetic acid (10 mL) in ethanol (900 mL) followed by heating. Flash column chromatography was performed using Bodman silica gel 32-63, 60Å. <sup>1</sup>H NMR and <sup>13</sup>C NMR spectra were recorded on INOVA-400 or Mer-300. Proton chemical shifts are given in δ relative to tetramethylsilane (δ 0.00 ppm) in CDCl<sub>3</sub> or to the residual proton signals of the deuterated solvent in CD<sub>3</sub>OD (δ 3.35 ppm). Carbon chemical shifts were internally referenced to the deuterated solvent signals in CDCl<sub>3</sub> (δ 77.00 ppm) or CD<sub>3</sub>OD (δ 49.00 ppm). High-resolution mass spectra were recorded on an Agilent ESI-TOF mass spectrometer. Enantiomeric excesses were determined by chiral-phase HPLC using a Hitachi instrument. Optical rotations were measured on a Perkin-Elmer 241 polarimeter.

## Synthesis of catalyst 1 (Scheme S1).

Scheme S1

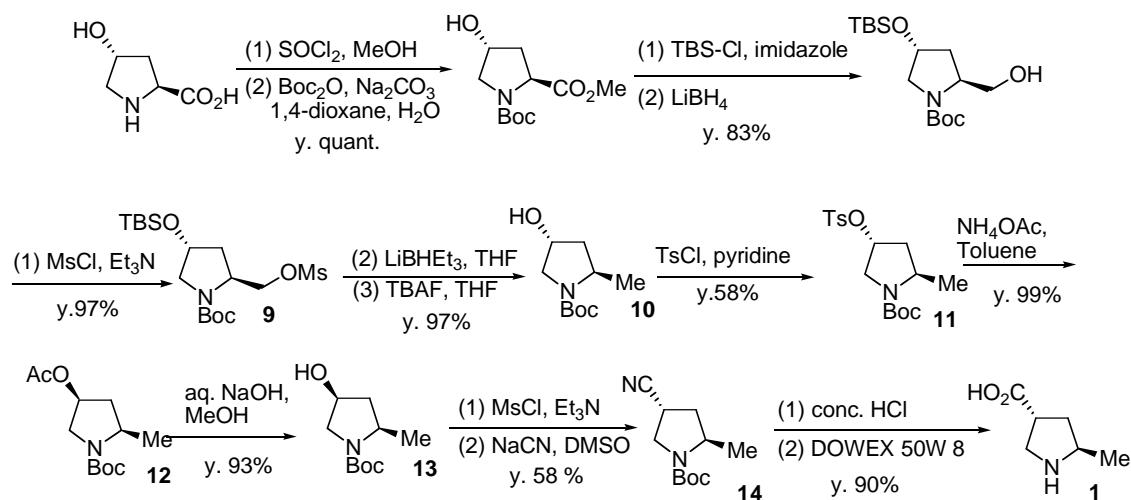

### (2S,4R)-tert-Butyl 4-(tert-butyldimethylsilyloxy)-2-(hydroxymethyl)pyrrolidine-1-carboxylate.<sup>S1</sup>

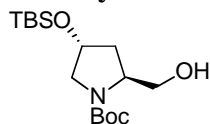

This compound was synthesized from *trans*-4-hydroxy-L-proline by the reported procedures.<sup>S1</sup> <sup>1</sup>H NMR (400 MHz, CDCl<sub>3</sub>): δ 0.08 (s, 6H), 0.87 (s, 9H), 1.47 (s, 9H), 1.96 (m, 1H), 1.98 (s, 1H), 3.34 (dd, *J* = 4.0, 14.6Hz, 1H), 3.42 (d, *J* = 12.0Hz, 1H), 3.55 (m, 1H), 3.71 (m, 1H), 4.11 (m, 1H), 4.27 (m, 1H), 4.91 (dd, *J* = 0.8 Hz, 12.0 Hz, 1H).

### (2S,4R)-tert-Butyl 4-(tert-butyldimethylsilyloxy)-2-((methylsulfonyloxy)methyl)pyrrolidine-1-carboxylate (9).

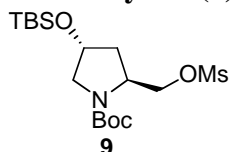

To a solution of (2S,4R)-tert-butyl 4-(tert-butyldimethylsilyloxy)-2-(hydroxymethyl)pyrrolidine-1-carboxylate (6.50 g, 19.6 mmol) and Et<sub>3</sub>N (5.5 mL, 39.2 mmol) in CH<sub>2</sub>Cl<sub>2</sub> (80 ml) was added MsCl (2.3 mL, 29.4 mmol) at 4 °C.<sup>S1</sup> After stirring for 3 h at the same temperature, the mixture was poured into water and extracted with AcOEt. The organic layers were combined, washed

(S1) Rosen, T.; Chu, D. T. W.; Lico, I. M.; Fernandes, P. B.; Marsh, K.; Shen, L.; Cepa, V. G.; Pernet, A. *G. J. Med. Chem.* **1988**, *31*, 1598.

with brine, dried over Na<sub>2</sub>SO<sub>4</sub>, and concentrated in vacuo to afford **9** (7.80 g, 97%). <sup>1</sup>H NMR (400 MHz, CDCl<sub>3</sub>): δ 0.07 (s, 6H), 0.87 (s, 9H), 1.58 (s, 9H), 2.04 (m, 1H), 3.00 (s, 3H), 3.36 (d, *J* = 1.2 Hz, 2H), 3.51 (m, 1H), 4.18 (m, 1H), 4.29 (m, 1H), 4.37 (m, 1H), 4.55 (m, 1H).

**(2*R*,4*R*)-tert-Butyl 4-hydroxy-2-methylpyrrolidine-1-carboxylate (10).**

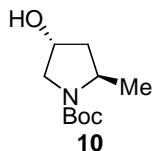

To a solution of compound **9** (7.80 g, 24.7 mmol) in THF (20 mL) was slowly added 1 M LiBHET<sub>3</sub> in THF solution (76.2 mL) at 4 °C and the mixture was allowed to warm to room temperature. After stirring for 2.5 h, the mixture was quenched with crushed-ice and extracted with AcOEt.<sup>S1</sup> The organic layers were combined, washed with brine, dried over Na<sub>2</sub>SO<sub>4</sub>, and concentrated. The residue was dissolved in THF (100 mL) and 1 M *n*-Bu<sub>4</sub>NF solution was added at 4 °C.<sup>S1</sup> After stirring for 16 h, the mixture was poured into water and extracted with AcOEt. The organic layers were combined, washed with brine, dried over Na<sub>2</sub>SO<sub>4</sub>, and concentrated in vacuo. The residue was purified by flash chromatography (hexane/AcOEt = 3:1 – 2:1) to afford **10** (3.70 g, 97%). <sup>1</sup>H NMR (400 MHz, CDCl<sub>3</sub>): δ 1.23 (m, 3H), 1.47 (s, 9H), 1.55 (br, 1H), 1.74 (m, 1H), 2.10 (m, 1H), 3.44-3.49 (m, 2H), 4.00 (m, 1H), 4.40 (m, 1H). <sup>13</sup>C NMR (100 MHz, CDCl<sub>3</sub>): δ 21.20, 28.43, 42.44, 51.56, 54.28, 69.43, 79.34, 155.14. HRMS: calcd for C<sub>10</sub>H<sub>19</sub>NO<sub>3</sub> (MNa<sup>+</sup>) 224.1257, found 224.1255.

**(2*R*,4*R*)-tert-Butyl 2-methyl-4-(tosyloxy)pyrrolidine-1-carboxylate (11).**

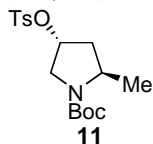

To a solution of compound **10** (1.30 g, 6.46 mmol) in pyridine (10 mL) was added TsCl (2.22 g, 11.6 mmol) at 4 °C and the mixture was allowed to warm to room temperature.<sup>S2</sup> After stirring for 30 h, the mixture was poured into 2 N HCl solution and extracted with AcOEt. The organic layers were combined, washed with sat. NaHCO<sub>3</sub> solution and brine, dried over Na<sub>2</sub>SO<sub>4</sub>, and concentrated in vacuo. The residue was purified by flash chromatography (hexane/AcOEt = 10:1 – 6:1) to afford **11** (1.33 g, 58%). <sup>1</sup>H NMR (400 MHz, CDCl<sub>3</sub>): δ 1.21 (d, *J* = 6.0, 3H), 1.44 (s, 9H), 1.74 (m, 1H), 2.26 (m, 1H), 2.46 (s, 3H), 3.41 (m, 1H), 3.62 (d, *J* = 13.2 Hz, 1H), 3.96 (m, 1H), 4.97 (m, 1H), 7.35 (d, *J* = 12.0 Hz, 2H), 7.78 (d, *J* = 12.0 Hz, 2H).

(S2) (a) Bridges, R. J.; Stanley, M. S.; Anderson, M. W.; Cotman, C. W.; Chamberlin, A. R.. *J. Med. Chem.* **1991**, *34*, 717. (b) Heindl, C.; Hubner, H.; Gmeiner, P. *Tetrahedron: Asymmetry* **2003**, *14*, 3141.

**(2*R*,4*S*)-*tert*-Butyl 4-acetoxy-2-methylpyrrolidine-1-carboxylate (12).**

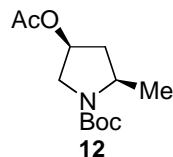

To a solution compound **11** (1.35 g, 3.80 mmol) in toluene (15 mL) was added NH<sub>4</sub>OAc (1.49 g, 4.94 mmol).<sup>S2</sup> After reflux for 4 h, the mixture was cooled to room temperature, poured into water, and extracted with AcOEt. The organic layers were combined, washed with brine, dried over Na<sub>2</sub>SO<sub>4</sub>, and concentrated in vacuo. The residue was purified flash column chromatography (hexane/AcOEt = 10:1) to afford **12** (0.91 g, 99%). <sup>1</sup>H NMR (400 MHz, CDCl<sub>3</sub>): δ 1.30 (d, *J* = 5.2 Hz, 3H), 1.47 (s, 9H), 1.77 (dd, *J* = 0.4Hz, 14.0 Hz, 1H), 2.07 (s, 3H), 2.30 (m, 1H), 3.46 (m, 1H), 3.65 (m, 1H), 3.97 (m, 1H), 5.23 (m, 1H).

**(2*R*,4*S*)-*tert*-Butyl 4-hydroxy-2-methylpyrrolidine-1-carboxylate (13).**

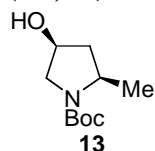

To a solution of compound **12** (0.910 g, 3.74 mmol) in MeOH (5 mL) and THF (1 mL) was added 2 N NaOH solution (5.6 mL, 11.2 mmol) at room temperature.<sup>S2b,S3</sup> After stirring for 30 min, the mixture was poured into water and extracted with AcOEt. The organic layers were combined, washed with brine, dried over Na<sub>2</sub>SO<sub>4</sub>, and concentrated in vacuo to afford **13** (0.703 g, 93%) as a colorless solid. <sup>1</sup>H NMR (400 MHz, CDCl<sub>3</sub>): δ 1.36 (d, *J* = 6.4 Hz, 3H), 1.47 (s, 9H), 1.59 (d, *J* = 3.2Hz, 1H), 1.67 (d, *J* = 13.6 Hz, 1H), 2.26 (m, 1H), 3.35 (dd, *J* = 2.0 Hz, 12.0 Hz, 1H), 3.63 (m, 1H), 3.91(m, 1H), 4.41(m, 1H). <sup>13</sup>C NMR (100 MHz, CDCl<sub>3</sub>): δ 21.77, 28.51, 41.53, 52.49, 54.75, 77.21, 79.22, 154.52. HRMS: calcd for C<sub>10</sub>H<sub>19</sub>NO<sub>3</sub> (MNa<sup>+</sup>) 224.1257, found 224.1262.

**(2*R*,4*R*)-*tert*-Butyl 4-cyano-2-methylpyrrolidine-1-carboxylate (14).**

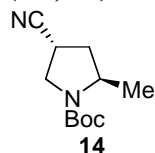

To a solution of compound **13** (0.70 g, 3.48 mmol) and Et<sub>3</sub>N (0.97 mL, 6.96 mmol) in CH<sub>2</sub>Cl<sub>2</sub> (10 mL) was added MsCl (0.40 mL, 5.22 mmol) at 4 °C.<sup>S2</sup> After stirring for 3 h at the same

---

(S3) Zhao, X.; Hoesl, C. E.; Hoefner, G. C.; Wanner, K. T. *Eur. J. Med. Chem.* **2005**, *40*, 231.

temperature, the mixture was poured into water and extracted with AcOEt. The organic layers were combined, washed with brine, dried over  $\text{Na}_2\text{SO}_4$ , and concentrated in vacuo to give the mesylated compound (0.97 g, 100%). Without further purification, this residue was dissolved in DMSO (10 mL) and NaCN (0.256 g, 5.22 mmol) was added.<sup>S2</sup> This mixture was stirred at 80 °C for 20 h. The mixture was treated with sat.  $\text{NaHCO}_3$  and extracted with AcOEt. The organic layers were combined, washed with brine, dried over  $\text{Na}_2\text{SO}_4$ , and concentrated in vacuo. The residue was purified by flash column chromatography (hexane/AcOEt = 6:1) to give **14** (0.422 g, 58%).  $^1\text{H}$  NMR (400MHz,  $\text{CDCl}_3$ ):  $\delta$  1.20 (d,  $J$  = 8.4 Hz, 3H), 1.47 (s, 9H), 1.97 (m, 1H), 2.36 (m, 1H), 3.13 (m, 1H), 3.64-3.72 (m, 2H), 4.06 (br, 1H).  $^{13}\text{C}$  NMR (100MHz,  $\text{CDCl}_3$ ):  $\delta$  20.18, 26.11, 28.32, 36.73, 48.98, 52.00, 80.02, 119.88, 153.59. HRMS: calcd for  $\text{C}_{11}\text{H}_{18}\text{N}_2\text{O}_2$  ( $\text{MNa}^+$ ) 233.1260, found 233.1257.

### (3*R*,5*R*)-5-Methyl-3-pyrrolidinecarboxylic acid (**1**).

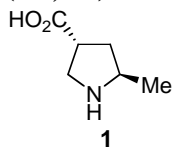

A solution of compound **14** (0.42 g, 2.00 mmol) in conc. HCl (4.2 mL) was refluxed for 2 h. The mixture was concentrated in vacuo. The resulting colorless solid was dissolved in water and the solution was loaded to Dowex 50WX8-100 ion-exchange resin ( $\text{H}^+$  form, activated with 0.01 M HCl). The resin was washed with water then eluted with 1 M ammonium hydroxide. The eluted fractions were lyophilized to afford **1** (0.232 g, 90%) as a colorless solid.  $^1\text{H}$  NMR (400 MHz,  $\text{CD}_3\text{OD}$ ):  $\delta$  1.41 (d,  $J$  = 8.4 Hz, 3H), 1.90 (m, 1H), 2.43 (m, 1H), 3.11 (m, 1H), 3.44 (dd,  $J$  = 8.0 Hz, 11.6 Hz, 1H), 3.56 (dd,  $J$  = 5.6 Hz, 11.6 Hz, 1H), 3.78 (m, 1H).  $^{13}\text{C}$  NMR (100 MHz,  $\text{CD}_3\text{OD}$ ):  $\delta$  17.5, 37.6, 45.9, 49.3, 56.8, 179.7. HRMS: calcd for  $\text{C}_6\text{H}_{11}\text{NO}_2$  ( $\text{MH}^+$ ) 130.0863, found 130.0868.  $[\alpha]_D^{25} +10.3$  (c 0.58, MeOH).

### Another route from **10** to **13** (Scheme S2).

#### Scheme S2

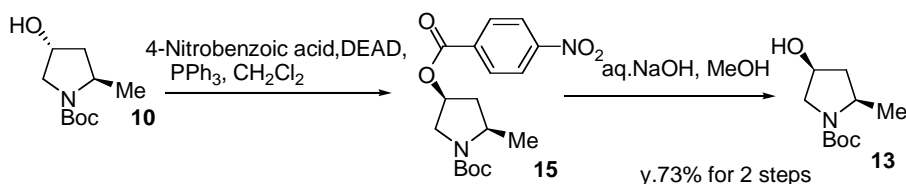

To a solution of compound **10** (0.70 g, 3.48 mmol) and  $\text{PPh}_3$  (1.37 g, 5.22 mmol) in  $\text{CH}_2\text{Cl}_2$  (7 mL) was added DEAD (0.91 mL, 5.22 mmol) at 4°C.<sup>S3</sup> The resulting mixture was stirred for 10 min and then 4-nitrobenzoic acid (1.62 g, 5.22 mmol) was added. This mixture was allowed to

warm up to room temperature and stirred for 16 h. The reaction mixture was quenched with 2 N NaOH solution and extracted with AcOEt. The organic layers were combined, washed with brine, dried over Na<sub>2</sub>SO<sub>4</sub>, and concentrated. The residue was purified by flash column chromatography to give **15** (0.885 g, 73 %) as a pale yellow solid. Compound **15**: <sup>1</sup>H NMR (400 MHz, CDCl<sub>3</sub>): δ 1.38 (d, *J* = 0.4 Hz, 3H), 1.48 (s, 9H), 1.96 (d, *J* = 14.4 Hz, 1H), 2.47 (m, 1H), 3.64-3.83 (m, 2H), 4.11 (m, 1H), 5.55 (m, 1H), 8.21 (d, *J* = 8.0 Hz, 2H), 8.31 (d, *J* = 8.0 Hz, 2H). Compound **15** (0.885 g, 2.51 mmol) was dissolved in MeOH (5 mL) and THF (5 mL) and 2 N NaOH solution was added at room temperature. After stirring for 30min, the mixture was poured into water and extracted with AcOEt. The organic layers were combined, washed with brine, dried over Na<sub>2</sub>SO<sub>4</sub>, and concentrated in vacuo to give compound **13** (0.52 g, 100%) as a colorless solid.

**General procedure for the Mannich-type reaction between *N*-PMP protected α-imino ethyl glyoxylate and aldehyde donors (Table 1).** *N*-PMP-protected α-imino ethyl glyoxylate (0.25 mmol, 1 equiv) was dissolved in anhydrous DMSO (2.5 mL) and aldehyde (0.5 mmol, 2 equiv) was added, followed by catalyst **1** (0.0125 mmol, 0.05 equiv). After stirring for 0.5-3 h at room temperature, the mixture was worked up by addition of aqueous saturated ammonium chloride solution and extracted with AcOEt (three or four times). The combined organic layers were washed with brine, dried with MgSO<sub>4</sub>, filtered, concentrated in vacuo, and purified by flash column chromatography (10-15% AcOEt/hexane) to afford the corresponding Mannich addition product. When the catalyst loading was 1 or 2 mol%, the reaction was performed using *N*-PMP-protected α-imino ethyl glyoxylate (0.5 mmol, 1 equiv), aldehyde (1.0 mmol, 2 equiv), and catalyst **1** (0.005 or 0.01 mmol, 0.01 or 0.02 equiv) in DMSO (5 mL). The reactions were performed in a closed system (a vial with a cap). An inert atmosphere of nitrogen or argon was not necessary for the reactions.

**Ethyl (2*S*,3*R*)-3-formyl-2-(*p*-methoxyphenylamino)butanoate (**2**).**

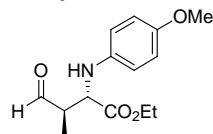

<sup>1</sup>H NMR (400 MHz, CDCl<sub>3</sub>): δ 1.17 (d, *J* = 7.2 Hz, 3H, CHCH<sub>3</sub>), 1.23 (t, *J* = 7.2 Hz, 3H, OCH<sub>2</sub>CH<sub>3</sub>), 2.85-2.92 (m, 1H, CHCHO), 3.74 (s, 3H, OCH<sub>3</sub>), 4.09 (brd, *J* = 8.4 Hz, 1H, NHPMP), 4.14-4.23 (m, 2H, OCH<sub>2</sub>CH<sub>3</sub>), 4.34-4.37 (brdd, *J* = 6.0 Hz, 8.8 Hz, 1H, CHNHPMP), 6.66 (d, *J* = 9.0 Hz, 2H, ArH), 6.78 (d, *J* = 9.0 Hz, 2H, ArH), 9.73 (d, *J* = 1.2 Hz, 1H, CHCHO).

$^{13}\text{C}$  NMR (100 MHz,  $\text{CDCl}_3$ ):  $\delta$  201.9, 171.8, 153.2, 140.1, 115.6, 114.9, 61.6, 58.6, 55.7, 48.5, 14.2, 9.9. HRMS: calcd for  $\text{C}_{14}\text{H}_{20}\text{NO}_4$  ( $\text{MH}^+$ ) 266.1387, found 266.1382.

**Ethyl (*E*)-3-benzyloxyiminomethyl-2-(*p*-methoxyphenylamino)butanoate (**16**).**

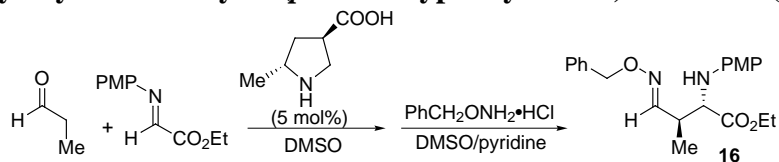

A mixture of *N*-PMP-protected  $\alpha$ -imino ethyl glyoxylate (0.5 mmol, 1 equiv), an aldehyde donor (1.0 mmol, 2 equiv), and catalyst **1** (0.025 mmol, 0.05 equiv) in DMSO (5 mL) was stirred for 1 h at room temperature. To the mixture, *O*-benzylhydroxylamine hydrochloride (1.3 mmol) and pyridine (0.5 mL) were added. The mixture was stirred for an additional 4 h at room temperature, filtered through Celite, and concentrated in vacuo. The residue was purified by flash column chromatography to afford oxime **16**.  $^1\text{H}$  NMR (400 MHz,  $\text{CDCl}_3$ ):  $\delta$  1.18 (d,  $J = 6.6$  Hz, 3H,  $\text{CHCH}_3$ ), 1.21 (t,  $J = 7.2$  Hz, 3H,  $\text{OCH}_2\text{CH}_3$ ), 2.86-2.95 (m, 1H,  $\text{CH}_3\text{CHCH}=\text{N}$ ), 3.74 (s, 3H,  $\text{OCH}_3$ ), 3.91-3.98 (m, 2H,  $\text{NHCHCO}_2\text{Et}$ ), 4.14 (q,  $J = 7.2$  Hz, 2H,  $\text{OCH}_2\text{CH}_3$ ), 5.07 (s, 2H,  $\text{CH}_2\text{Ph}$ ), 6.55 (d,  $J = 9.0$  Hz, 2H,  $\text{ArH}$ ), 6.75 (d,  $J = 9.0$  Hz, 2H,  $\text{ArH}$ ), 7.31-7.44 (m, 6H,  $\text{ArH}$  and  $\text{CH}=\text{N}$ ).  $^{13}\text{C}$  NMR (100 MHz,  $\text{CDCl}_3$ ):  $\delta$  172.5, 152.8, 151.8, 140.8, 137.6, 128.4, 128.2, 127.8, 115.2, 114.8, 75.7, 61.3, 61.2, 55.7, 37.5, 14.7, 14.2. HRMS: calcd for  $\text{C}_{21}\text{H}_{27}\text{N}_2\text{O}_4$  ( $\text{MH}^+$ ) 371.1965, found 371.1966. HPLC (Daicel Chairalcel AD, hexane/*i*-PrOH = 99:1, flow rate 1.0 mL/min,  $\lambda = 254$  nm):  $t_{\text{R}}$  (*anti* major enantiomer) = 66.6 min,  $t_{\text{R}}$  (*anti* minor enantiomer) = 57.8 min.

**Ethyl (2*S*,3*R*)-3-formyl-2-(*p*-methoxyphenylamino)-4-methylpentanoate (**3**).**

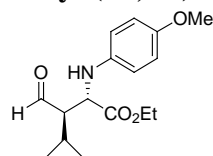

$^1\text{H}$  NMR (300 MHz,  $\text{CDCl}_3$ ):  $\delta$  1.07 (d,  $J = 6.9$  Hz, 3H,  $\text{CHCH}_3$ ), 1.12 (d,  $J = 6.9$  Hz, 3H,  $\text{CHCH}_3$ ), 1.21 (t,  $J = 7.2$  Hz, 3H,  $\text{OCH}_2\text{CH}_3$ ), 2.02-2.18 (m, 1H,  $\text{CH}(\text{CH}_3)_2$ ), 2.57-2.63 (m, 1H,  $\text{CHCHO}$ ), 3.74 (s, 3H,  $\text{OCH}_3$ ), 4.00 (brs, 1H,  $\text{NH PMP}$ ), 4.15 (q,  $J = 6.9$  Hz, 2H,  $\text{OCH}_2\text{CH}_3$ ), 4.35 (d,  $J = 7.8$  Hz, 1H,  $\text{CHNH PMP}$ ), 6.66 (d,  $J = 9.0$  Hz, 2H,  $\text{ArH}$ ), 6.77 (d,  $J = 9.0$  Hz, 2H,  $\text{ArH}$ ), 9.75 (d, 1H,  $J = 3.3$  Hz,  $\text{CHCHO}$ ).  $^{13}\text{C}$  NMR (100 MHz,  $\text{CDCl}_3$ ):  $\delta$  203.2, 172.8, 153.2, 140.4, 115.9, 114.8, 61.3, 59.6, 57.2, 55.6, 27.5, 21.2, 19.2, 14.1. HRMS: calcd for  $\text{C}_{16}\text{H}_{24}\text{NO}_4$  ( $\text{MH}^+$ ) 294.1700, found 294.1701. HPLC (Daicel Chairalcel AS-H, hexane/*i*-PrOH = 99:1, flow rate 1.0 mL/min,  $\lambda = 254$  nm):  $t_{\text{R}}$  (*anti* major enantiomer, (2*S*,3*R*)-**3**) = 24.0 min,  $t_{\text{R}}$  (*anti* minor enantiomer, (2*R*,3*S*)-**3**) = 49.3 min.  $[\alpha]_{\text{D}}^{25} -35.4$  (c 1.8,  $\text{CHCl}_3$ ).

**Ethyl (2*S*,3*R*)-3-formyl-2-(*p*-methoxyphenylamino)octanoate (4).**

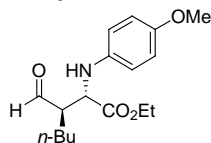

$^1\text{H}$  NMR (300 MHz,  $\text{CDCl}_3$ ):  $\delta$  0.89 (m, 3H,  $\text{CH}_2\text{CH}_2\text{CH}_3$ ), 1.23 (t,  $J = 7.2$  Hz, 3H,  $\text{OCH}_2\text{CH}_3$ ), 1.25-1.80 (m, 6H), 2.75 (m, 1H,  $\text{CHCHO}$ ), 3.74 (s, 3H,  $\text{OCH}_3$ ), 4.03 (brs, 1H,  $\text{NHPMP}$ ), 4.18 (dq,  $J = 0.9$  Hz, 7.2 Hz, 2H,  $\text{OCH}_2\text{CH}_3$ ), 4.26 (brd,  $J = 6.3$  Hz, 1H,  $\text{CHNHPMP}$ ), 6.65 (d,  $J = 9.0$  Hz, 2H,  $\text{ArH}$ ), 6.78 (d,  $J = 9.0$  Hz, 2H,  $\text{ArH}$ ), 9.65 (d,  $J = 2.4$  Hz, 1H,  $\text{CHCHO}$ ).  $^{13}\text{C}$  NMR (75 MHz,  $\text{CDCl}_3$ ):  $\delta$  202.3, 172.2, 153.2, 140.3, 115.7, 114.8, 61.5, 58.1, 55.7, 53.9, 29.4, 25.4, 22.6, 14.2, 13.8. HRMS: calcd for  $\text{C}_{17}\text{H}_{26}\text{NO}_4$  ( $\text{MH}^+$ ) 308.1856, found 308.1852. HPLC (Daicel Chiralcel AS-H, hexane/*i*-PrOH = 99:1, flow rate 1.0 mL/min,  $\lambda = 254$  nm):  $t_{\text{R}}$  (*anti* major enantiomer, (2*S*,3*R*)-4) = 24.4 min,  $t_{\text{R}}$  (*anti* minor enantiomer, (2*R*,3*S*)-4) = 28.5 min.  $[\alpha]_{\text{D}}^{25} -11.0$  (c 1.4,  $\text{CHCl}_3$ ).

**Ethyl (2*S*,3*R*)-3-formyl-2-(*p*-methoxyphenylamino)heptanoate (5).**

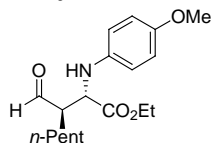

$^1\text{H}$  NMR (400 MHz,  $\text{CDCl}_3$ ):  $\delta$  0.87 (t,  $J = 6.8$  Hz, 3H,  $\text{CH}_2\text{CH}_3$ ), 1.23 (t,  $J = 7.2$  Hz, 3H,  $\text{OCH}_2\text{CH}_3$ ), 1.24-1.78 (m, 8H), 2.72-2.78 (m, 1H,  $\text{CHCHO}$ ), 3.74 (s, 3H,  $\text{OCH}_3$ ), 4.03 (brd,  $J = 6.4$  Hz, 1H,  $\text{NHPMP}$ ), 4.18 (dq,  $J = 1.6$  Hz, 7.2 Hz, 2H,  $\text{OCH}_2\text{CH}_3$ ), 4.26 (m, 1H,  $\text{CHNHPMP}$ ), 6.65 (d,  $J = 9.2$  Hz, 2H,  $\text{ArH}$ ), 6.78 (d,  $J = 9.2$  Hz, 2H,  $\text{ArH}$ ), 9.65 (d,  $J = 2.4$  Hz, 1H,  $\text{CHCHO}$ ).  $^{13}\text{C}$  NMR (100 MHz,  $\text{CDCl}_3$ ):  $\delta$  202.3, 172.2, 153.1, 140.3, 115.7, 114.8, 61.5, 58.1, 55.6, 53.9, 31.6, 27.0, 25.6, 22.3, 14.1, 13.9. HRMS: calcd for  $\text{C}_{18}\text{H}_{27}\text{NO}_4$  ( $\text{MH}^+$ ) 322.2013, found 322.2007. HPLC (Daicel Chiralpak AS, hexane/*i*-PrOH = 99:1, flow rate 1.0 mL/min,  $\lambda = 254$  nm):  $t_{\text{R}}$  (*anti* major enantiomer, (2*S*,3*R*)-5) = 21.5 min,  $t_{\text{R}}$  (*anti* minor enantiomer, (2*R*,3*S*)-5) = 24.9 min.  $[\alpha]_{\text{D}}^{25} -11.9$  (c 1.3,  $\text{CHCl}_3$ ).

**Ethyl (2*S*,3*R*)-3-formyl-2-(*p*-methoxyphenylamino)hex-5-enoate (6).**

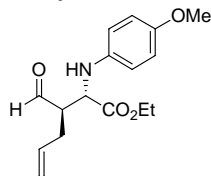

$^1\text{H}$  NMR (400 MHz,  $\text{CDCl}_3$ ):  $\delta$  1.23 (t,  $J = 7.2$  Hz, 3H,  $\text{OCH}_2\text{CH}_3$ ), 2.37-2.59 (m, 2H,  $\text{CH}_2\text{CH}=\text{CH}_2$ ), 2.94-2.99 (m, 1H,  $\text{CHCHO}$ ), 3.74 (s, 3H,  $\text{OCH}_3$ ), 4.08 (brd,  $J = 10.0$  Hz, 1H,



NHPMP), 4.18 (dq,  $J = 0.8$  Hz, 7.2 Hz, 2H,  $\text{OCH}_2\text{CH}_3$ ), 4.28 (m, 1H,  $\text{CHNHPMP}$ ), 5.12-5.17 (m, 2H,  $\text{CH}=\text{CH}_2$ ), 5.77-5.88 (m, 1H,  $\text{CH}=\text{CH}_2$ ), 6.65 (d,  $J = 9.2$  Hz, 2H,  $\text{ArH}$ ), 6.77 (d,  $J = 9.2$  Hz, 2H,  $\text{Ar-H}$ ), 9.69 (d,  $J = 1.6$  Hz, 1H,  $\text{CHCHO}$ ).  $^{13}\text{C}$  NMR (100 MHz,  $\text{CDCl}_3$ ):  $\delta$  201.9, 172.2, 153.1, 140.5, 134.3, 118.2, 115.8, 114.8, 61.6, 57.7, 55.6, 53.1, 30.0, 14.1. HRMS: calcd for  $\text{C}_{16}\text{H}_{22}\text{NO}_4$  ( $\text{MH}^+$ ) 292.1543, found 292.1537. HPLC (Daicel Chiralcel AS-H, hexane/*i*-PrOH = 99:1, flow rate 1.0 mL/min,  $\lambda = 254$  nm):  $t_R$  (*anti* major enantiomer, (2*S*,3*R*)-**6**) = 30.2 min,  $t_R$  (*anti* minor enantiomer, (2*R*,3*S*)-**6**) = 38.5 min.  $[\alpha]_D^{25} +21.5$  (c 1.0,  $\text{CHCl}_3$ ).

### Isopropyl (2*S*,3*R*)-3-formyl-2-(*p*-methoxyphenylamino)-4-methylpentanoate (**7**).

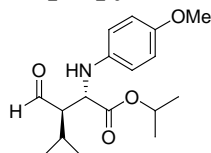

$^1\text{H}$  NMR (400 MHz,  $\text{CDCl}_3$ ):  $\delta$  1.07 (d,  $J = 6.8$  Hz, 3H,  $\text{CCHCH}_3$ ), 1.12 (d,  $J = 6.8$  Hz, 3H,  $\text{CCHCH}_3$ ), 1.16 (d,  $J = 6.4$  Hz, 3H,  $\text{OCHCH}_3$ ), 1.19 (d,  $J = 6.4$  Hz, 3H,  $\text{OCHCH}_3$ ), 2.04-2.14 (m, 1H,  $\text{CCH}(\text{CH}_3)_2$ ), 2.54-2.58 (m, 1H,  $\text{CHCHO}$ ), 3.73 (s, 3H,  $\text{OCH}_3$ ), 3.90 (brs, 1H,  $\text{NHPMP}$ ), 4.32 (d,  $J = 8.0$  Hz, 1H,  $\text{CHNHPMP}$ ), 4.96 (m, 1H,  $\text{OCH}(\text{CH}_3)_2$ ), 6.66 (d,  $J = 8.8$  Hz, 2H,  $\text{ArH}$ ), 6.76 (d,  $J = 8.8$  Hz, 2H,  $\text{ArH}$ ), 9.73 (d,  $J = 3.6$  Hz, 1H,  $\text{CHCHO}$ ).  $^{13}\text{C}$  NMR (100 MHz,  $\text{CDCl}_3$ ):  $\delta$  203.2, 172.2, 153.2, 140.4, 115.9, 114.7, 69.1, 59.6, 57.4, 55.6, 27.5, 21.7, 21.6, 21.2, 19.1. HRMS: calcd for  $\text{C}_{17}\text{H}_{25}\text{NO}_4$  ( $\text{MH}^+$ ) 308.1856, found 308.1859. HPLC (Daicel Chiralpak AS-H, hexane/*i*-PrOH = 99:1, flow rate 1.0 mL/min,  $\lambda = 254$  nm),  $t_R$  (*anti* major enantiomer, (2*S*,3*R*)-**7**) = 19.1 min,  $t_R$  (*anti* minor enantiomer, (2*R*,3*S*)-**7**) = 50.7 min.  $[\alpha]_D^{25} -34.7$  (c 2.3,  $\text{CHCl}_3$ ).

### Isopropyl (2*S*,3*R*)-3-formyl-2-(*p*-methoxyphenylamino)heptanoate (**8**).

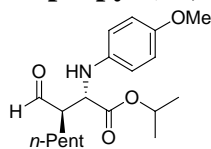

$^1\text{H}$  NMR (400 MHz,  $\text{CDCl}_3$ ):  $\delta$  0.87 (t,  $J = 6.9$  Hz, 3H,  $\text{CH}_3$ ), 1.18 (d,  $J = 6.4$  Hz, 3H,  $\text{OCHCH}_3$ ), 1.21 (d,  $J = 6.4$  Hz, 3H,  $\text{OCHCH}_3$ ), 1.25-1.76 (m, 8H), 2.69-2.74 (m, 1H,  $\text{CHCHO}$ ), 3.74 (s, 3H,  $\text{OCH}_3$ ), 4.02 (d,  $J = 10.0$  Hz, 1H,  $\text{NHPMP}$ ), 4.24 (dd, 1H,  $J = 6.8$  Hz, 10.0 Hz, 1H,  $\text{CHNHPMP}$ ), 4.98-5.08 (m, 1H,  $\text{OCHCH}_3$ ), 6.65 (d,  $J = 8.8$  Hz, 2H,  $\text{ArH}$ ), 6.77 (d,  $J = 8.8$  Hz, 2H,  $\text{ArH}$ ), 9.65 (d,  $J = 2.6$  Hz, 1H,  $\text{CHCHO}$ ).  $^{13}\text{C}$  NMR (100 MHz,  $\text{CDCl}_3$ ):  $\delta$  202.2, 171.6, 153.1, 140.3, 115.7, 114.8, 69.4, 58.2, 55.6, 53.9, 31.7, 27.0, 25.6, 22.3, 21.7, 21.7, 13.9. HRMS: calcd for  $\text{C}_{19}\text{H}_{29}\text{NO}_4$  ( $\text{MH}^+$ ) 336.2169, found 336.2174. HPLC (Daicel Chiralpak OJ-H, hexane/*i*-PrOH = 99:1, flow rate 1.0 mL/min,  $\lambda = 254$  nm);  $t_R$  (*anti* major enantiomer, (2*S*,3*R*)-**8**) = 29.9 min,  $t_R$  (*anti* minor enantiomer, (2*R*,3*S*)-**8**) = 27.7 min.  $[\alpha]_D^{25} -20.3$  (c 1.5,  $\text{CHCl}_3$ ).

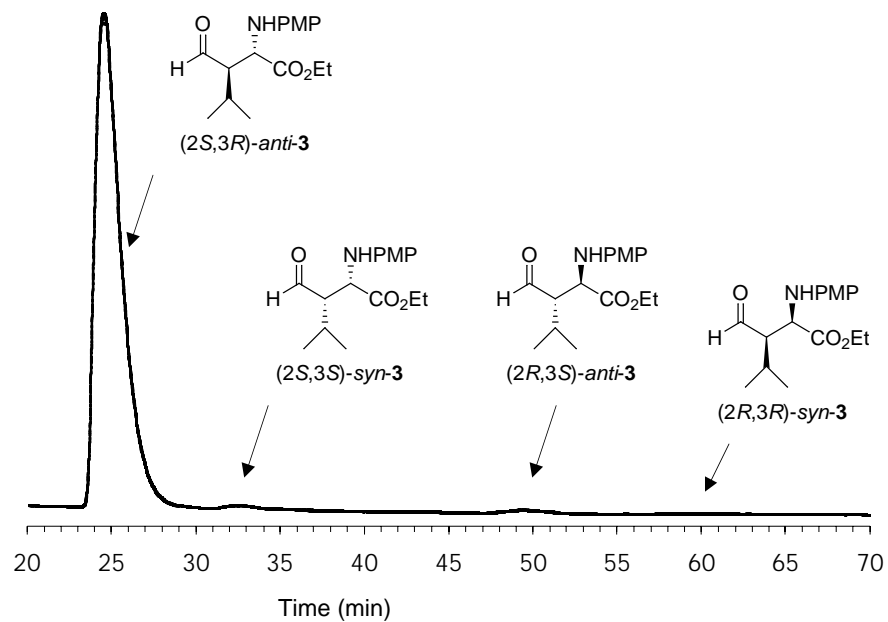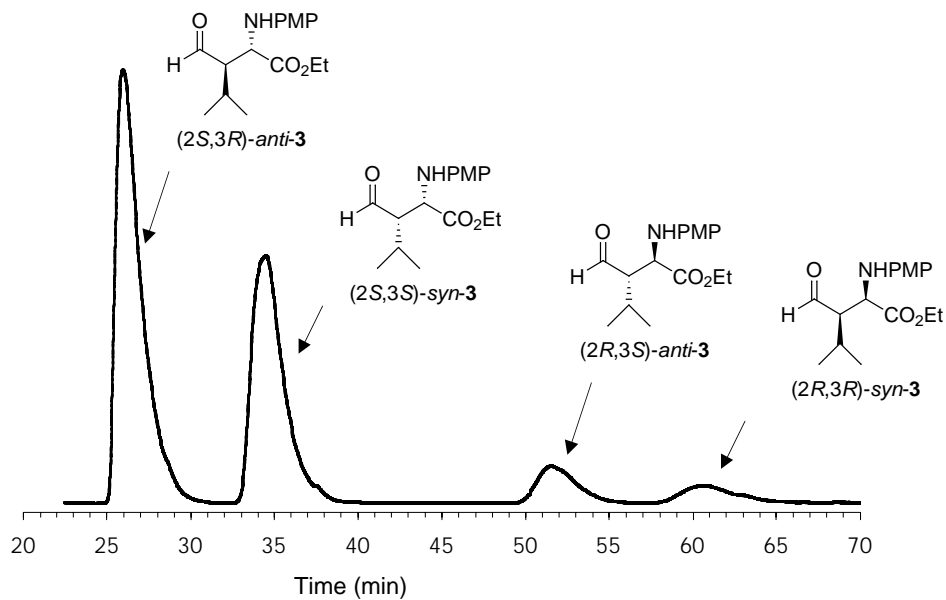

**Figure S1.** HPLC charts of the Mannich product **3** generated by the **1**-catalyzed reaction (upper chart) and of a mixture of the diastereomers and enantiomers of **3** (lower chart).

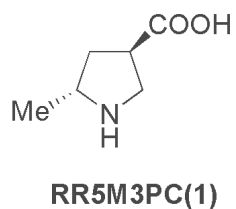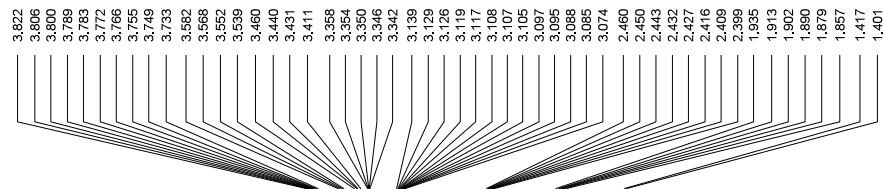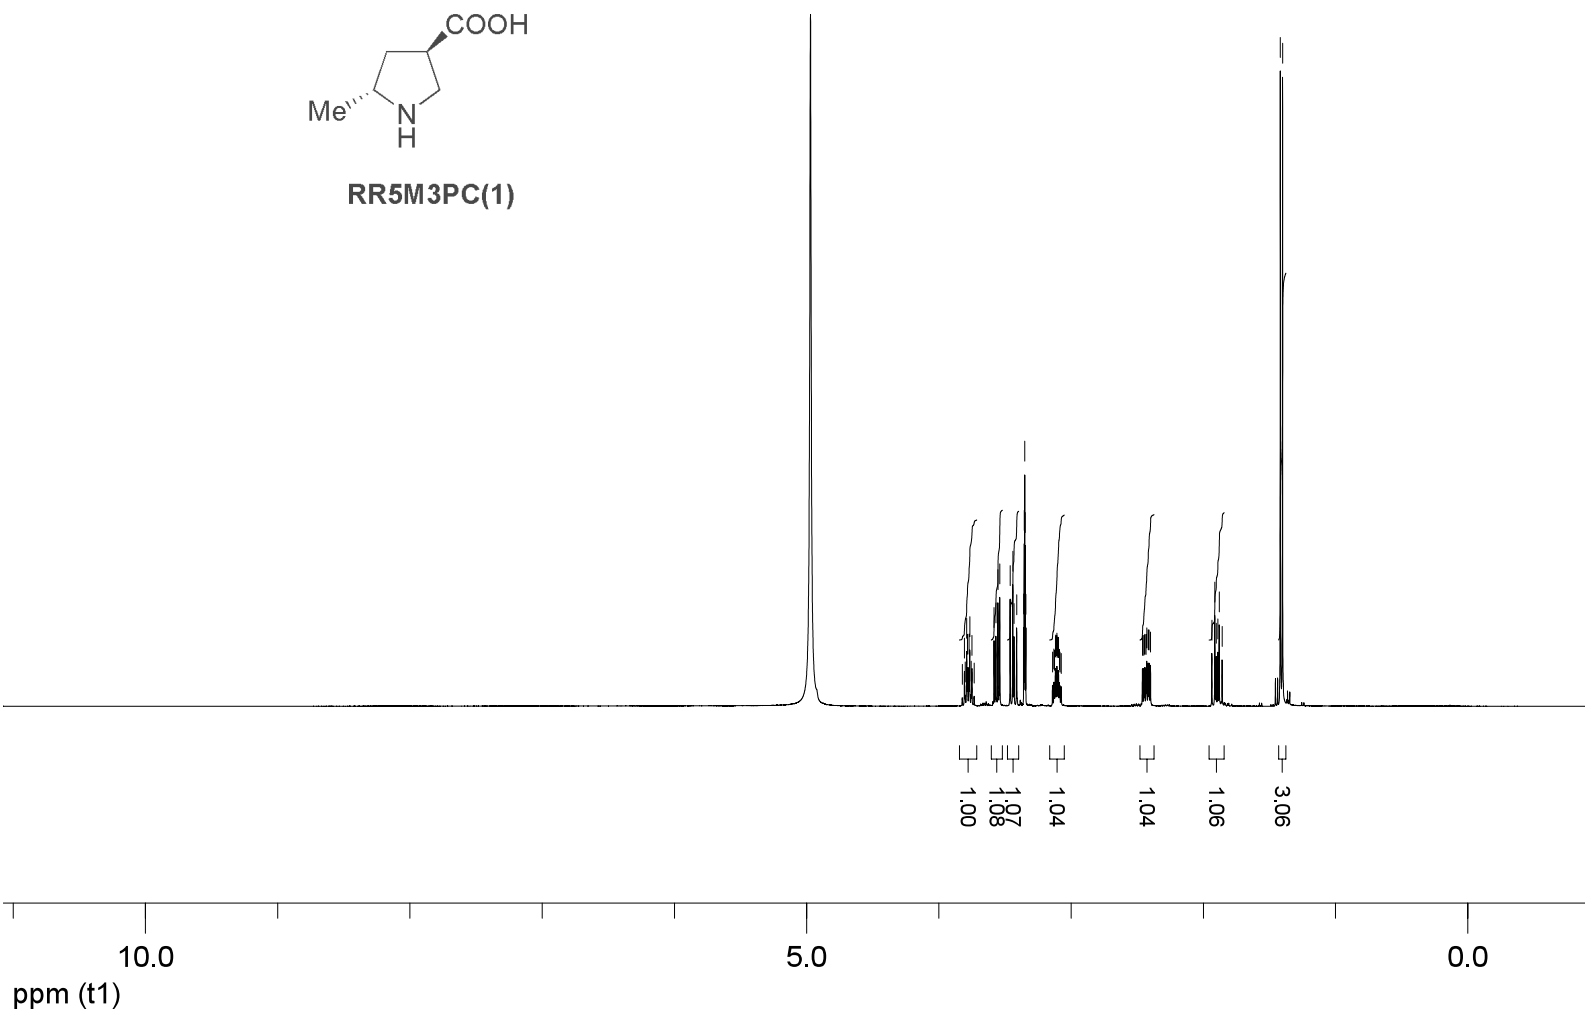

**Date:**  
 11 Oct 2005  
**Document's Title:**  
 catalyst.fid.mrc  
**Spectrum Title:**  
 susumu278-01\_30Aug2005

**Frequency (MHz):**  
 (f1) 399.740  
**Original Points Count:**  
 (f1) 17959  
**Actual Points Count:**  
 (f1) 65536  
**Acquisition Time (sec):**  
 (f1) 3.7440  
**Spectral Width (ppm):**  
 (f1) 12.000  
**Pulse Program:**  
 Unknown  
**Temperature:**  
 29

**Number of Scans:**  
 128  
**Acq. Date:**  
 Aug 30 2005

179.706

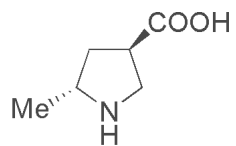

RR5M3PC(1)

56.834  
49.639  
49.426  
49.265  
49.213  
49.000  
48.787  
48.574  
48.361  
45.915  
37.632  
17.482

**Date:**  
11 Oct 2005  
**Document's Title:**  
catalyst(carbon13).fid.mrc

**Spectrum Title:**  
susumu278-01\_31Aug2005

**Frequency (MHz):**  
(f1) 100.525  
**Original Points Count:**  
(f1) 30135  
**Actual Points Count:**  
(f1) 65536  
**Acquisition Time (sec):**  
(f1) 1.1994  
**Spectral Width (ppm):**  
(f1) 249.944  
**Pulse Program:**  
Unknown  
**Temperature:**  
29

**Number of Scans:**  
512

**Acq. Date:**  
Aug 31 2005

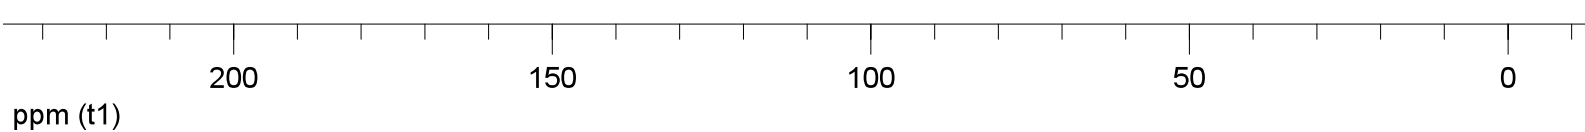

9.739  
9.736  
9.729  
9.727

7.260  
6.798  
6.775  
6.673  
6.651

4.201  
4.189  
4.183  
4.171  
3.743  
3.739  
3.736  
2.901  
2.897  
2.886  
2.883  
2.879  
2.868  
2.865  
1.595  
1.250  
1.232  
1.214  
1.184  
1.166

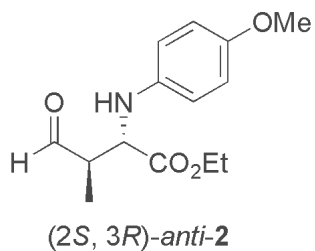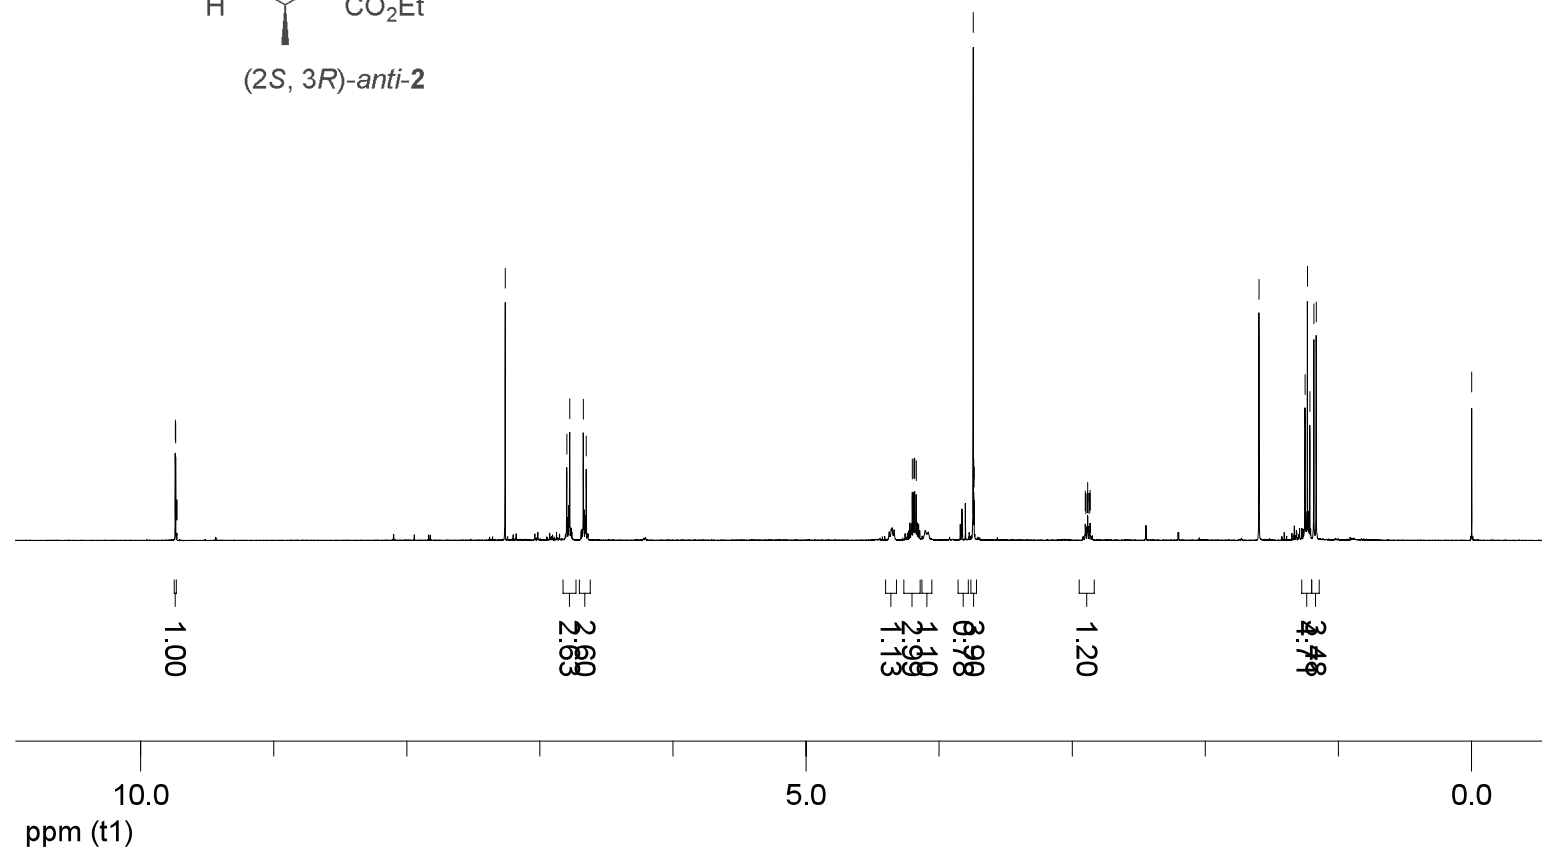

**Date:**  
16 Sep 2005  
**Document's Title:**  
Me.mrc

**Spectrum Title:**  
ZHL-1203A\_08Sep2005

**Frequency (MHz):**  
(f1) 399.739  
**Original Points Count:**  
(f1) 23946  
**Actual Points Count:**  
(f1) 32768  
**Acquisition Time (sec):**  
(f1) 3.7440  
**Spectral Width (ppm):**  
(f1) 16.000  
**Pulse Program:**  
Unknown  
**Temperature:**  
29

**Number of Scans:**  
8

**Acq. Date:**  
Sep 8 2005

201.87

171.76

153.16

140.12

115.63

114.90

77.32

77.00

76.68

61.63

58.64

55.67

48.50

14.15

9.89

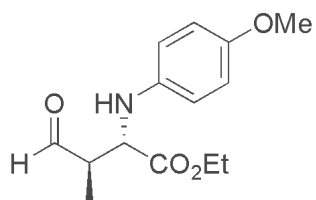

(2S, 3R)-anti-2

**Date:**  
10 Oct 2005  
**Document's Title:**  
Me-car.mrc  
**Spectrum Title:**  
ZHL-1203ACar\_08Sep2005

**Frequency (MHz):**  
(f1) 100.525  
**Original Points Count:**  
(f1) 30135  
**Actual Points Count:**  
(f1) 32768  
**Acquisition Time (sec):**  
(f1) 1.1994  
**Spectral Width (ppm):**  
(f1) 249.945  
**Pulse Program:**  
Unknown  
**Temperature:**  
29

**Number of Scans:**  
2000

**Acq. Date:**  
Sep 8 2005

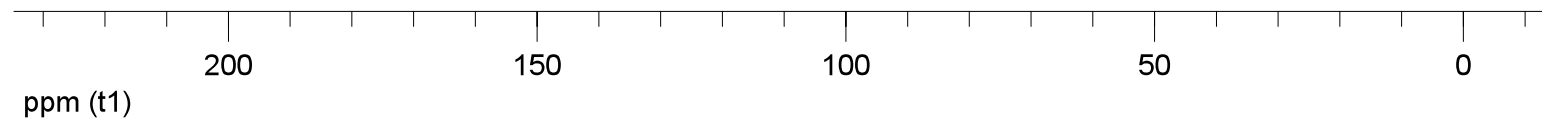

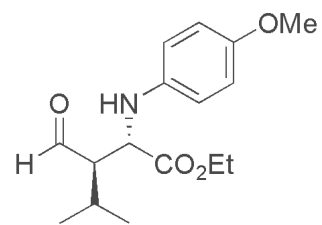

(2S, 3R)-anti-3

9.785  
9.775  
9.752  
9.741

7.263  
6.787  
6.757  
6.678  
6.648

4.367  
4.341  
4.164  
4.141  
3.740  
2.627  
2.615  
2.606  
2.601  
2.595  
2.590  
2.581  
2.569  
2.135  
2.112  
2.090  
2.068  
1.608  
1.231  
1.207  
1.184  
1.137  
1.114  
1.087  
1.064

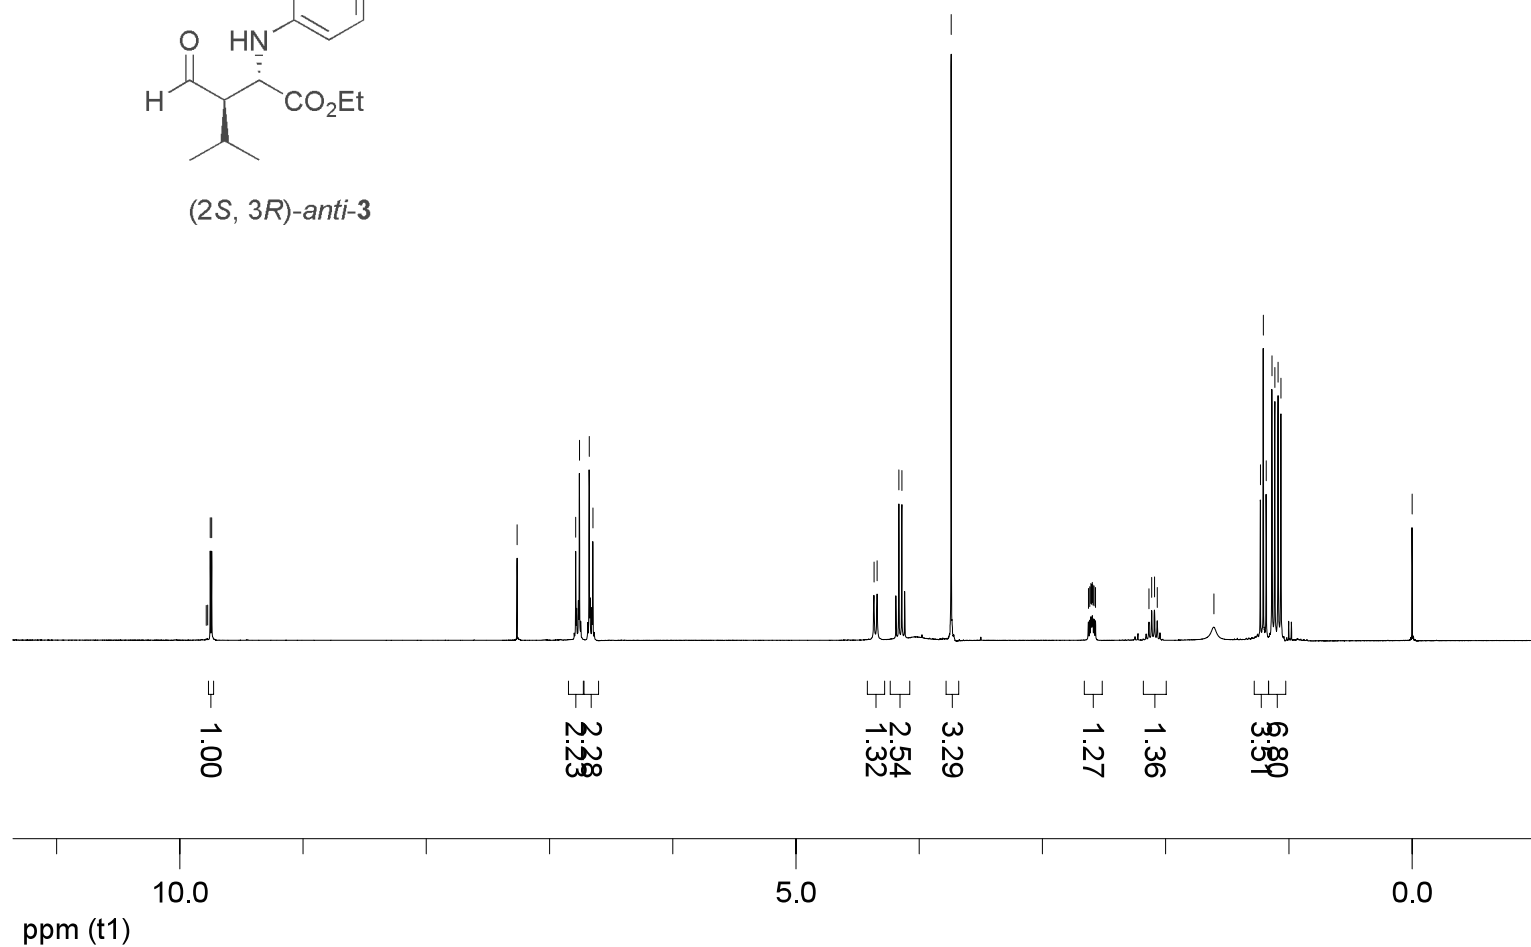

**Date:**  
16 Sep 2005  
**Document's Title:**  
iPr.mrc

**Spectrum Title:**  
ZHL-1194sec\_02Sep2005

**Frequency (MHz):**  
(f1) 300.143  
**Original Points Count:**  
(f1) 9596  
**Actual Points Count:**  
(f1) 16384  
**Acquisition Time (sec):**  
(f1) 1.9979  
**Spectral Width (ppm):**  
(f1) 16.003  
**Pulse Program:**  
Unknown  
**Temperature:**  
25

**Number of Scans:**  
40

**Acq. Date:**  
Sep 2 2005

**Date:**  
10 Oct 2005  
**Document's Title:**  
iPr-car.mrc

**Spectrum Title:**  
ZHL-1194car\_01Sep2005

**Frequency (MHz):**  
(f1) 100.525  
**Original Points Count:**  
(f1) 30135  
**Actual Points Count:**  
(f1) 32768  
**Acquisition Time (sec):**  
(f1) 1.1994  
**Spectral Width (ppm):**  
(f1) 249.945  
**Pulse Program:**  
Unknown  
**Temperature:**  
29

**Number of Scans:**  
256

**Acq. Date:**  
Sep 1 2005

203.225  
172.822  
153.249  
140.441  
115.858  
114.766  
77.317  
77.000  
76.682  
61.340  
59.597  
57.224  
55.621  
27.537  
21.245  
19.151  
14.120

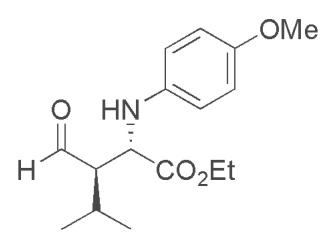

(2S, 3R)-anti-3

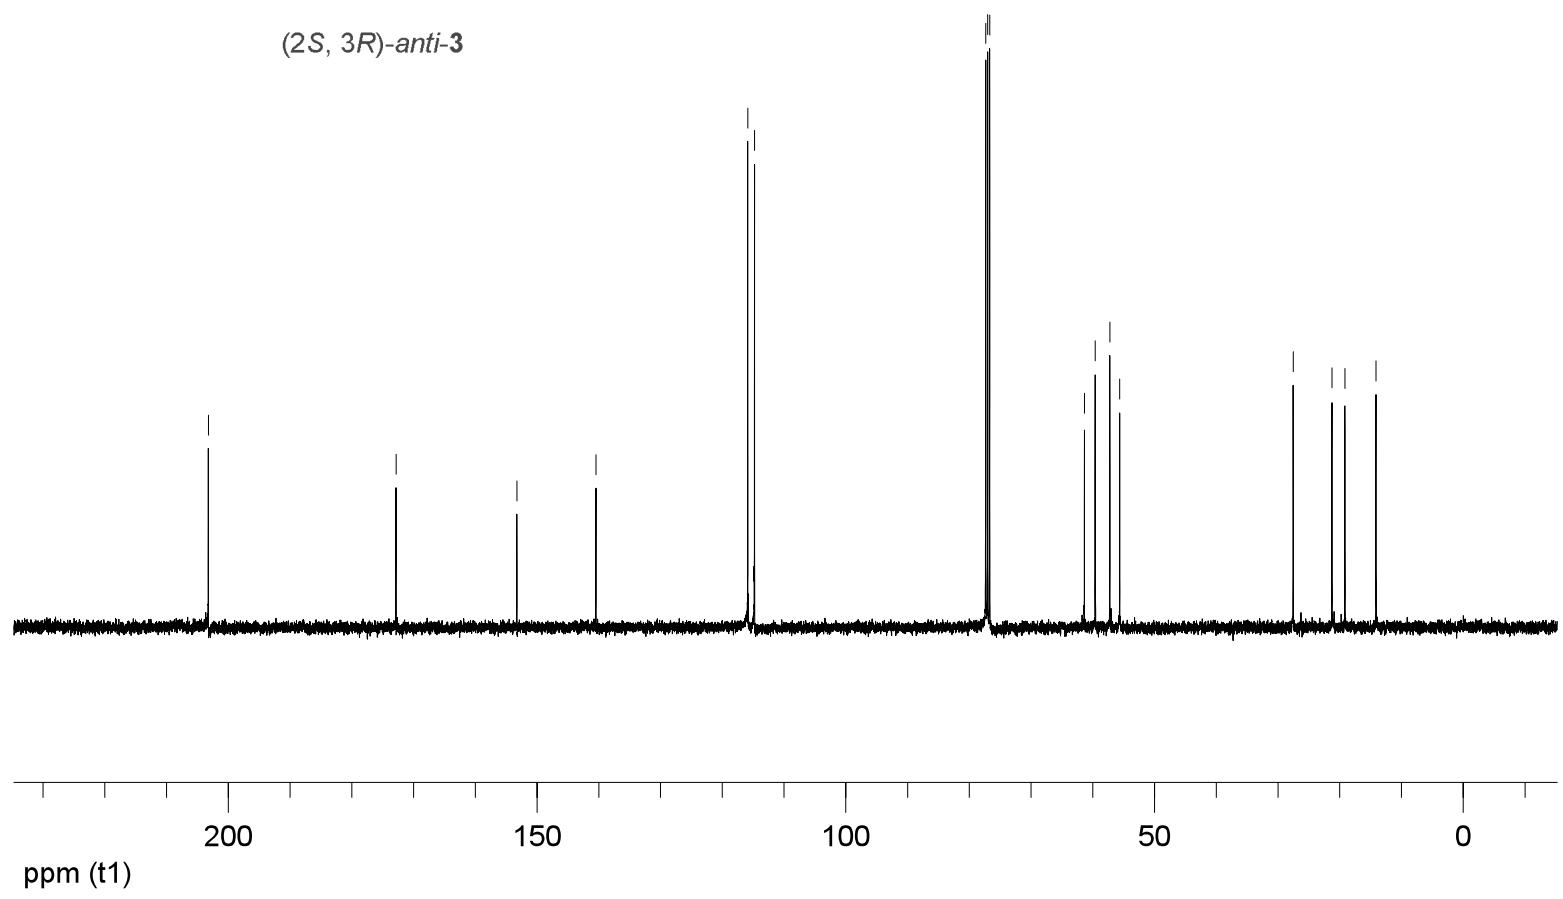



**Date:**  
16 Sep 2005  
**Document's Title:**  
Bu.mrc

**Spectrum Title:**  
ZHL-1201A-b1\_07Sep2005

**Frequency (MHz):**  
(f1) 300.143  
**Original Points Count:**  
(f1) 9596  
**Actual Points Count:**  
(f1) 16384  
**Acquisition Time (sec):**  
(f1) 1.9979  
**Spectral Width (ppm):**  
(f1) 16.003  
**Pulse Program:**  
Unknown  
**Temperature:**  
25

**Number of Scans:**  
40  
**Acq. Date:**  
Sep 7 2005

9.715  
9.709  
9.660  
9.652  
  
7.262  
6.793  
6.763  
6.664  
6.634  
  
4.271  
4.250  
4.210  
4.202  
4.190  
4.186  
4.166  
4.163  
4.150  
4.139  
4.038  
3.742  
2.754  
2.745  
2.736  
  
1.605  
1.343  
1.337  
1.326  
1.314  
1.250  
1.226  
1.202  
0.944

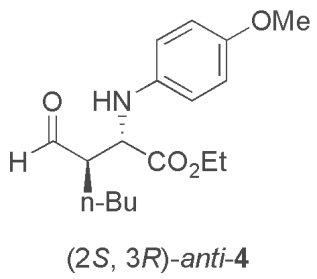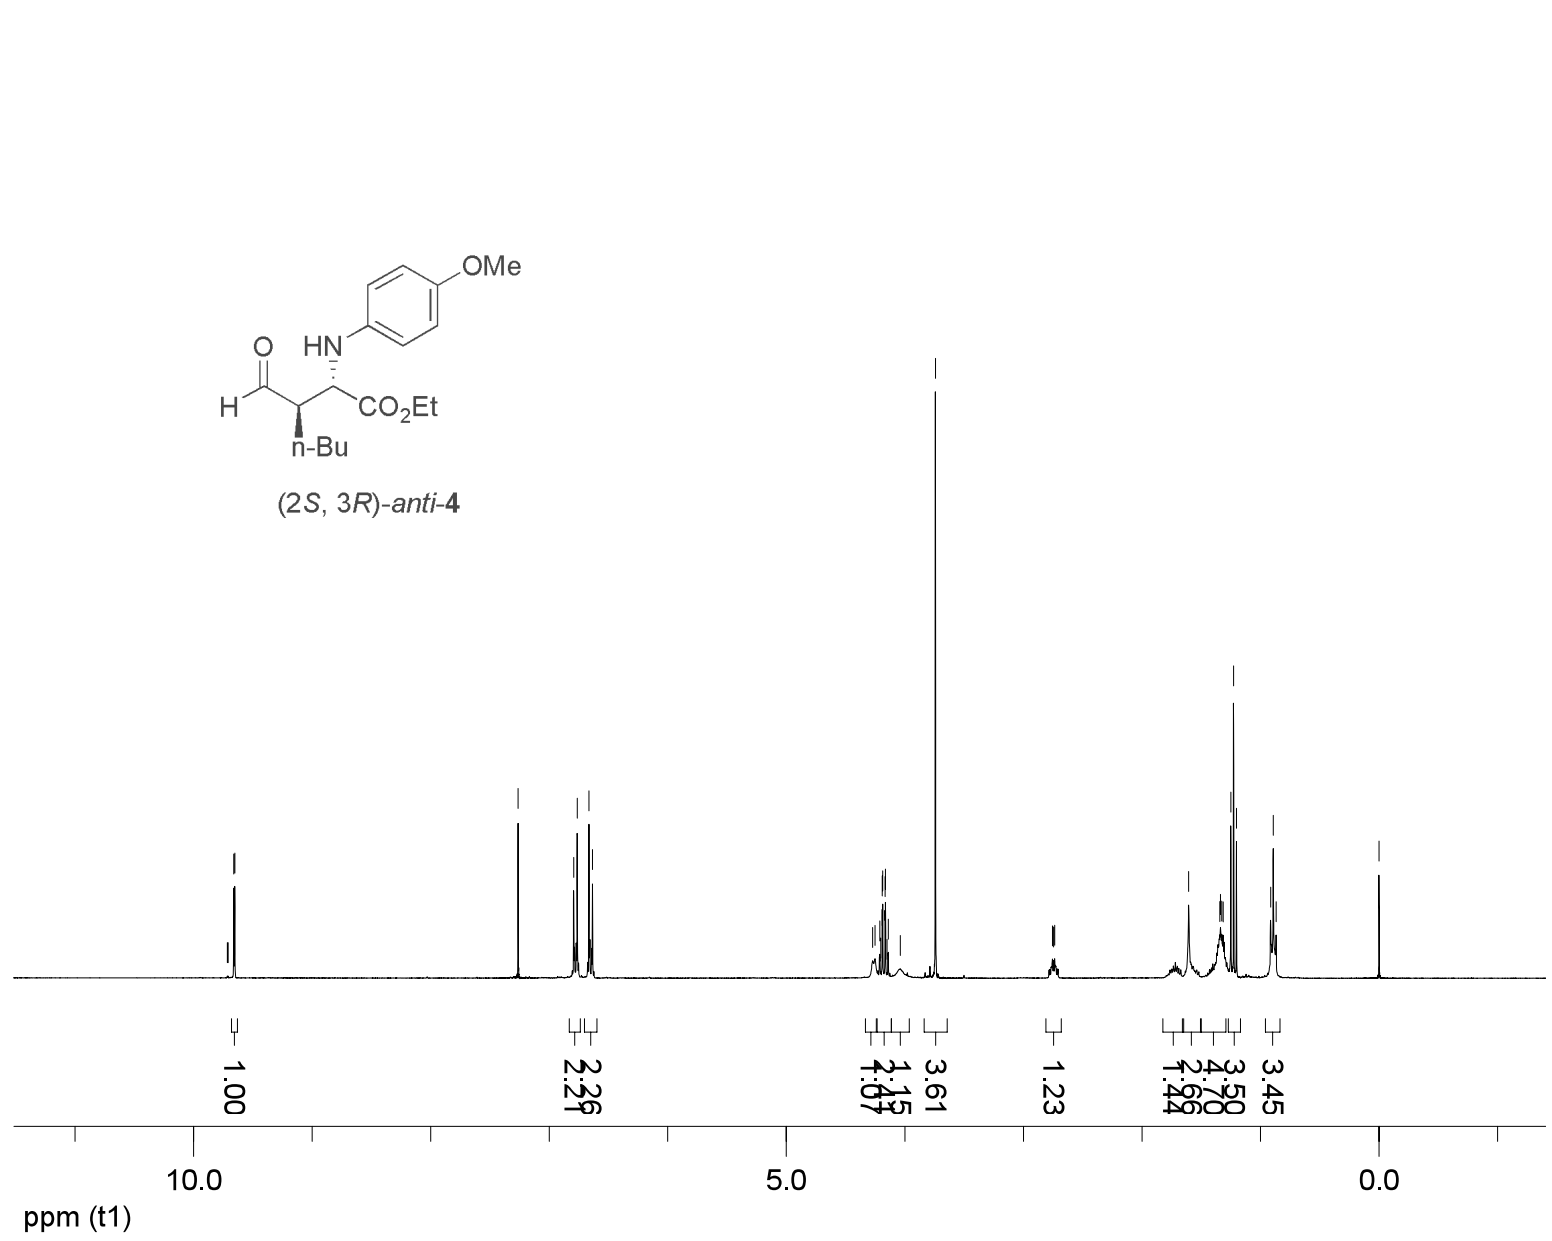

202.275  
 172.209  
 153.159  
 140.337  
 115.677  
 114.838  
 77.423  
 77.000  
 76.577  
 61.507  
 58.108  
 55.654  
 53.903  
 29.418  
 25.392  
 22.591  
 14.164  
 13.780

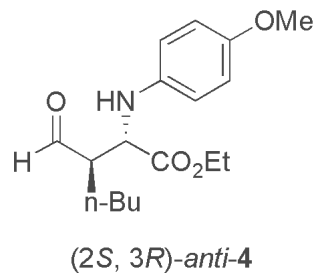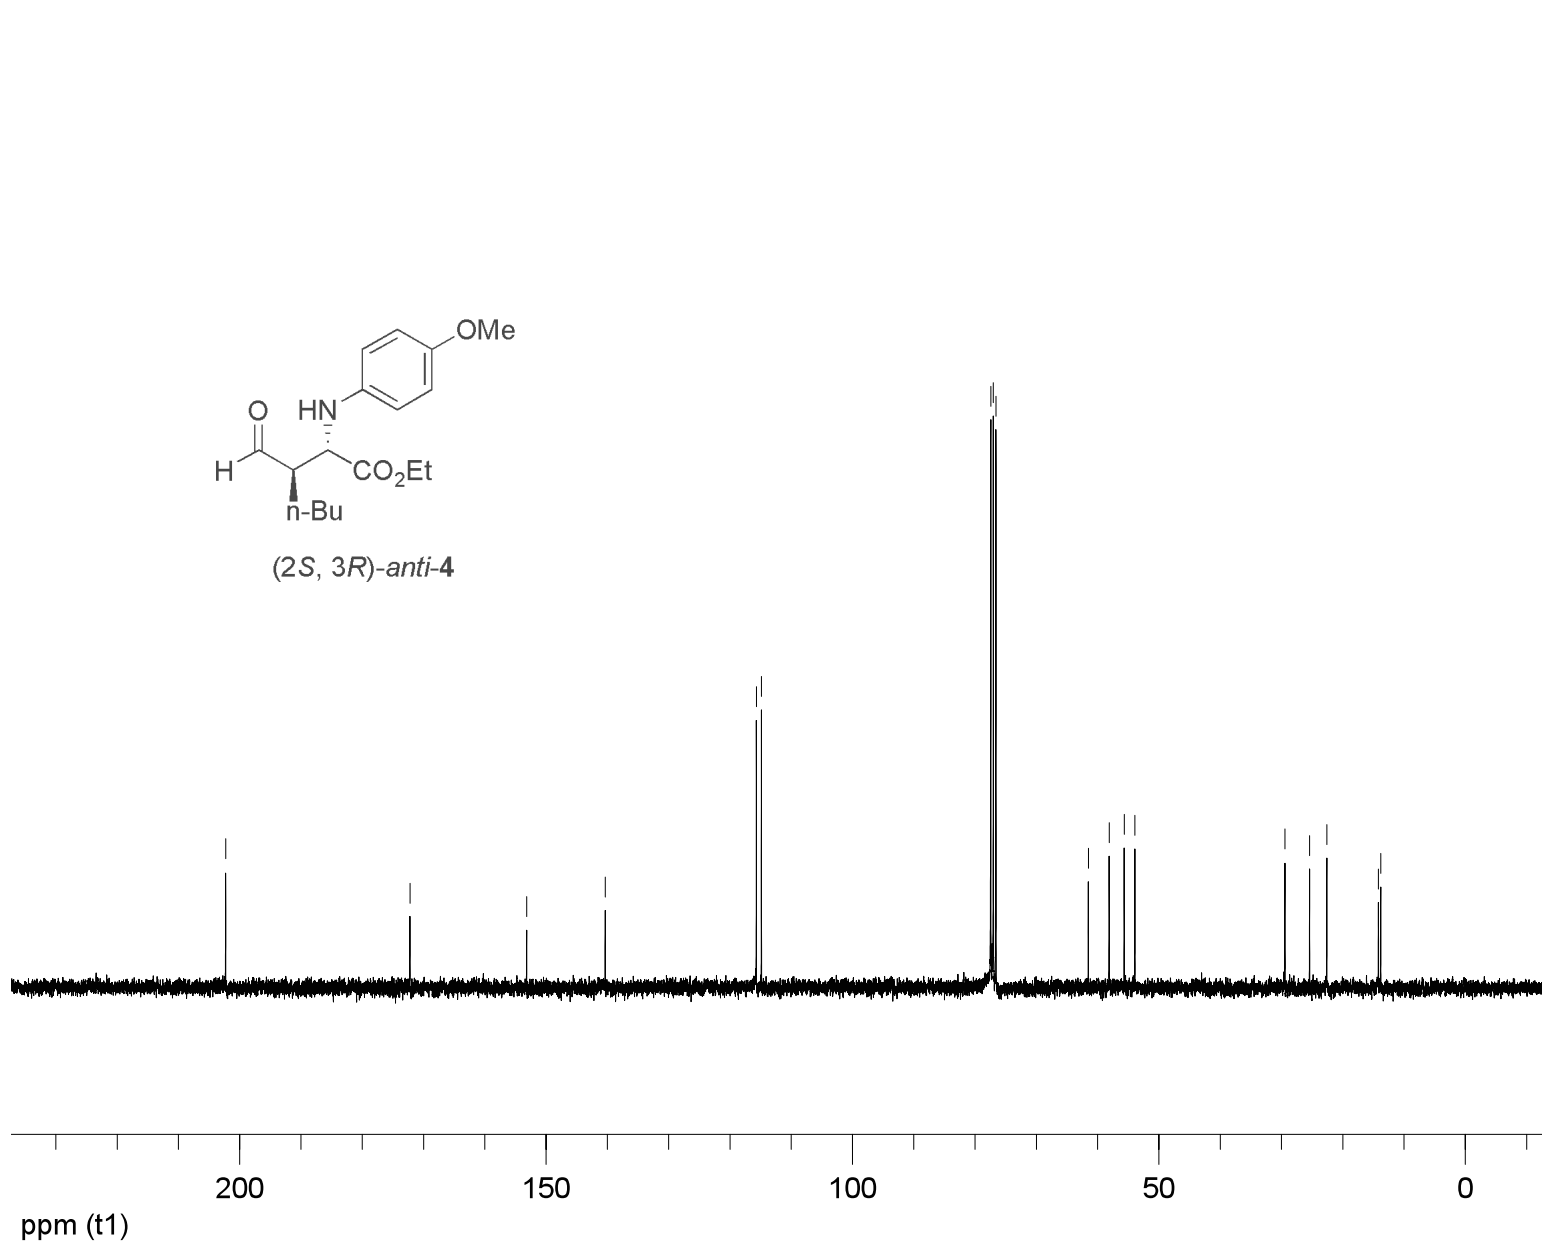

**Date:**  
 16 Sep 2005  
**Document's Title:**  
 ZHL-1201-Acar.mrc  
**Spectrum Title:**  
 ZHL-1201-Ab1car\_07Sep2005  
**Frequency (MHz):**  
 (f1) 75.479  
**Original Points Count:**  
 (f1) 34246  
**Actual Points Count:**  
 (f1) 65536  
**Acquisition Time (sec):**  
 (f1) 1.8150  
**Spectral Width (ppm):**  
 (f1) 249.976  
**Pulse Program:**  
 Unknown  
**Temperature:**  
 25  
**Number of Scans:**  
 1000  
**Acq. Date:**  
 Sep 7 2005

9.712  
9.708  
9.658  
9.652

7.264  
6.788  
6.765  
6.661  
6.638

4.261  
4.213  
4.204  
4.200  
4.186  
4.182  
4.168  
4.164  
4.151  
4.146  
4.137  
4.042

3.740  
2.755  
2.748  
2.741  
2.736

1.737  
1.725  
1.713  
1.703  
1.700  
1.571  
1.416  
1.404  
1.391  
1.383  
1.288  
1.281  
1.243

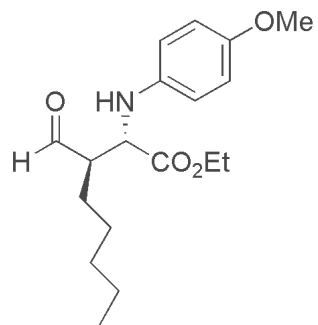

(2S, 3R)-anti-5

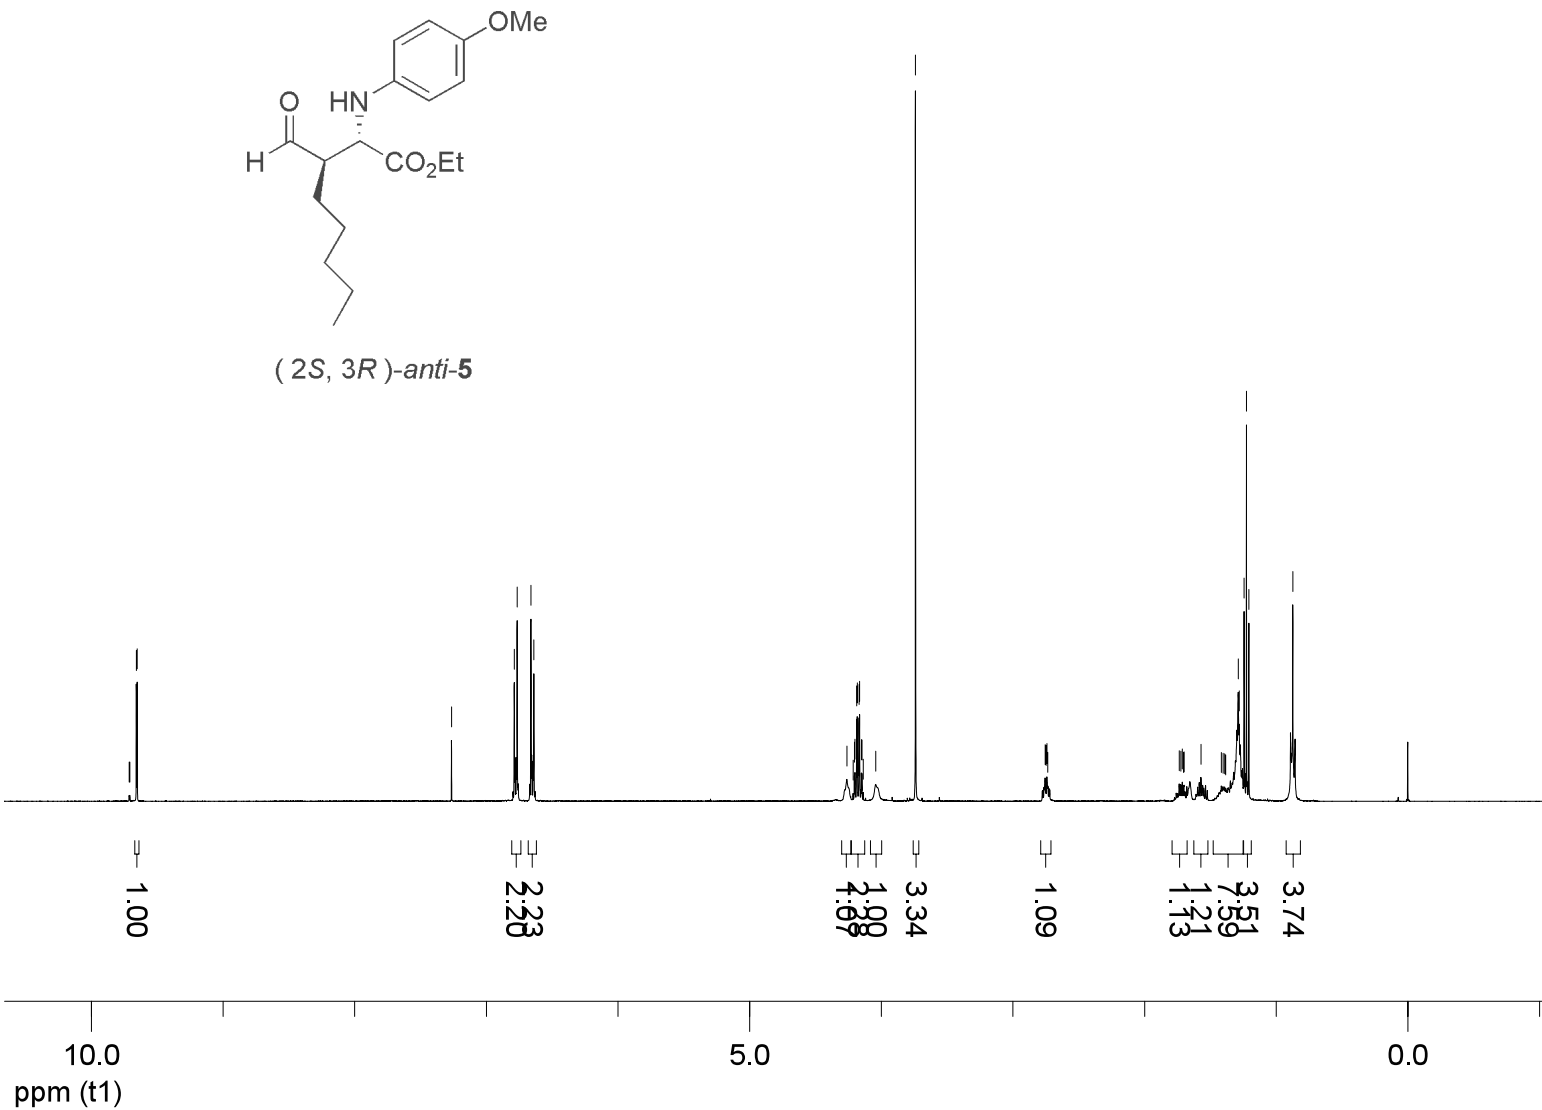

**Date:**  
17 Sep 2005  
**Document's Title:**  
pent.mrc

**Spectrum Title:**  
ZHL-1197-5789\_06Sep2005

**Frequency (MHz):**  
(f1) 399.739  
**Original Points Count:**  
(f1) 23946  
**Actual Points Count:**  
(f1) 32768  
**Acquisition Time (sec):**  
(f1) 3.7440  
**Spectral Width (ppm):**  
(f1) 16.000  
**Pulse Program:**  
Unknown  
**Temperature:**  
29

**Number of Scans:**  
8

**Acq. Date:**  
Sep 6 2005

**Date:**  
10 Oct 2005  
**Document's Title:**  
pent- car.mrc  
**Spectrum Title:**  
ZHL-1197-5789car\_06Sep2005

**Frequency (MHz):**  
(f1) 100.525  
**Original Points Count:**  
(f1) 30135  
**Actual Points Count:**  
(f1) 32768  
**Acquisition Time (sec):**  
(f1) 1.1994  
**Spectral Width (ppm):**  
(f1) 249.945  
**Pulse Program:**  
Unknown  
**Temperature:**  
29

**Number of Scans:**  
1000  
**Acq. Date:**  
Sep 6 2005

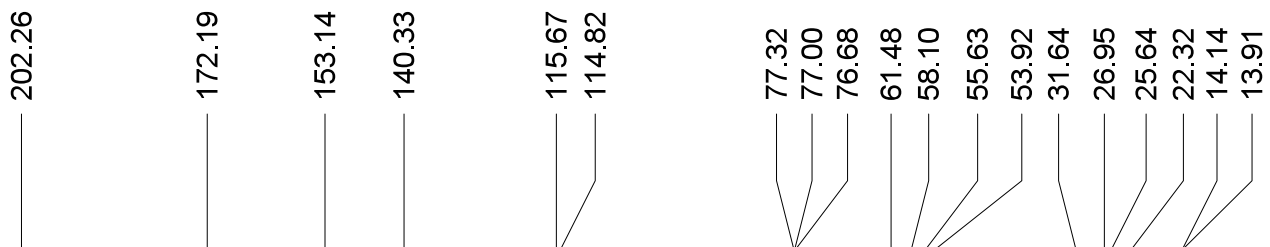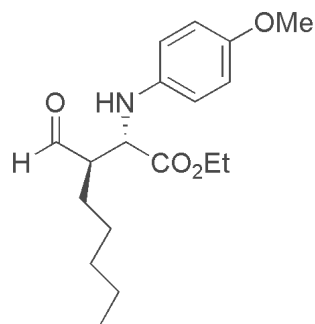

(2S, 3R)-anti-5

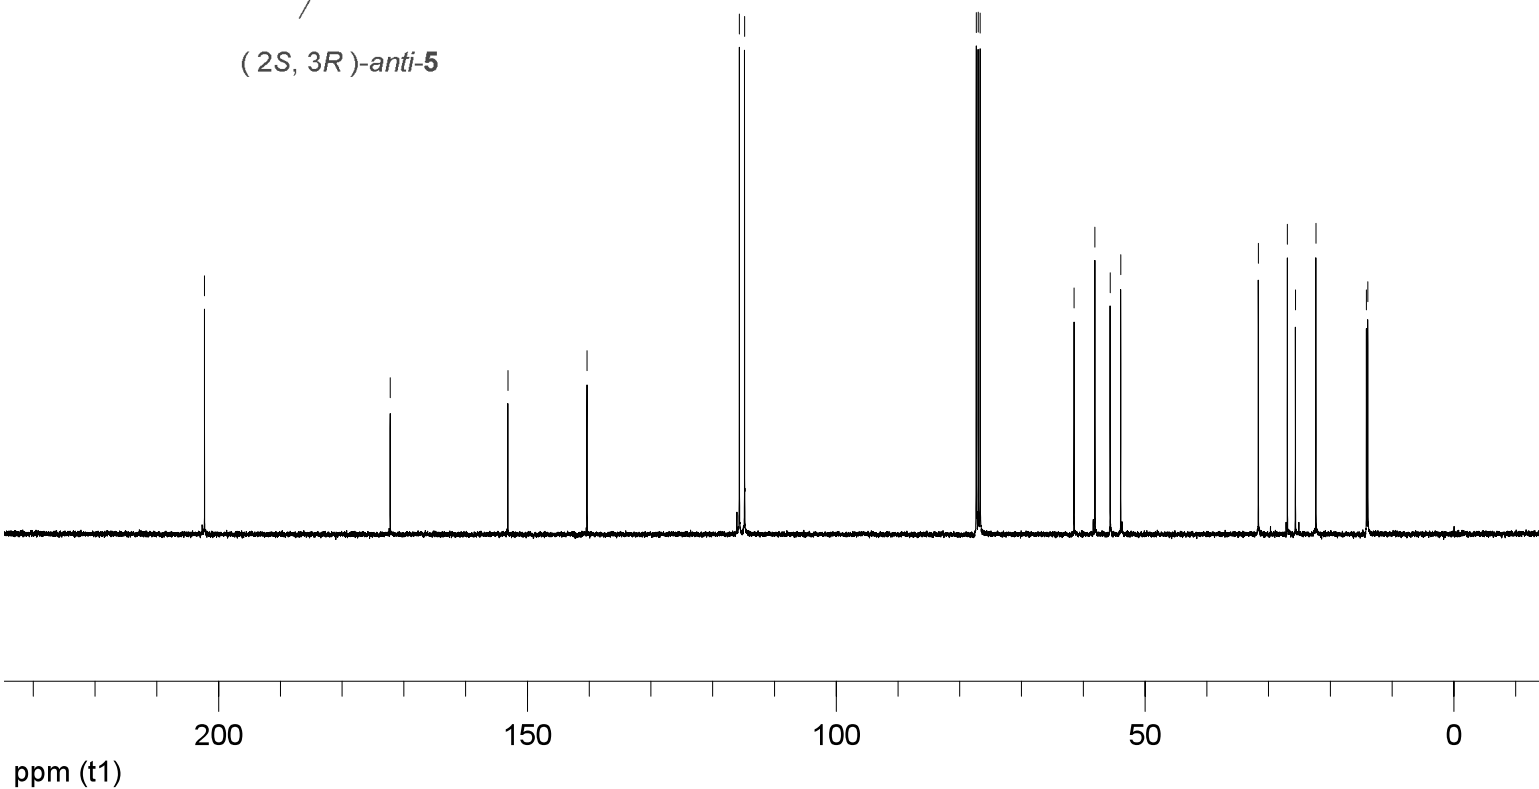

Date:

17 Sep 2005

Document's Title:

e-for JACS.mrc

Spectrum Title:

ZHL-1209-d1-d4\_11Sep2005

Frequency (MHz):

(f1) 399.739

Original Points Count:

(f1) 23946

Actual Points Count:

(f1) 32768

Acquisition Time (sec):

(f1) 3.7440

Spectral Width (ppm):

(f1) 16.000

Pulse Program:

Unknown

Temperature:

29

Number of Scans:

8

Acq. Date:

Sep 11 2005

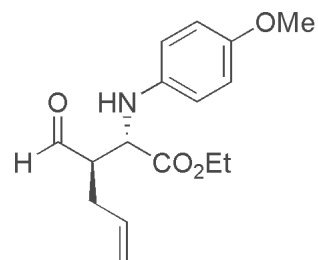

(2S, 3R)-anti-6

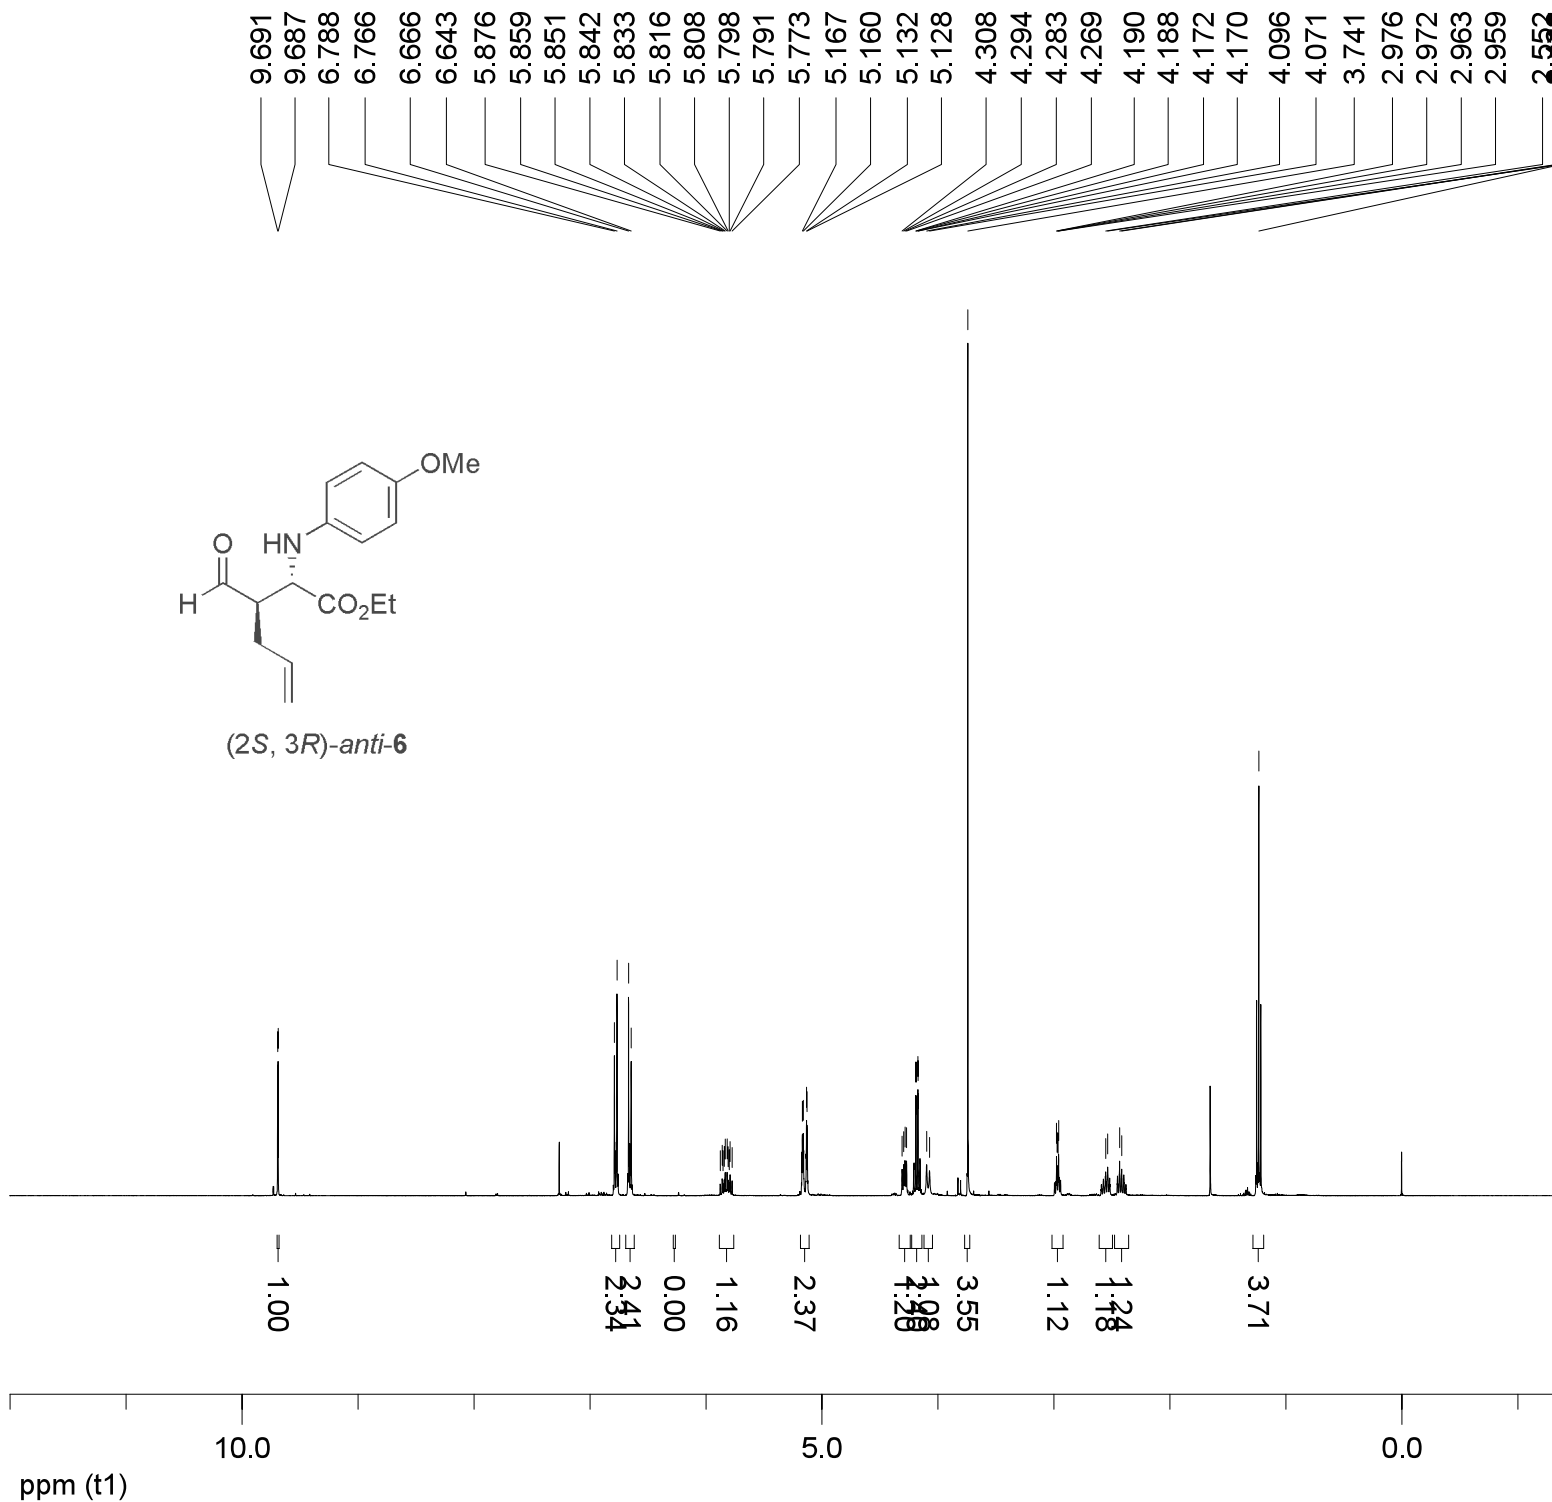

201.868  
 172.165  
 153.136  
 140.523  
 134.284  
 118.215  
 115.757  
 114.801  
 77.318  
 77.000  
 76.682  
 61.577  
 57.703  
 55.627  
 53.103  
 30.014  
 14.110

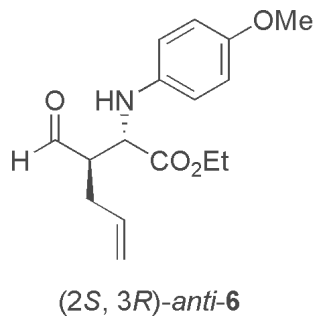

**Date:**  
 10 Oct 2005  
**Document's Title:**  
 e-car.mrc  
**Spectrum Title:**  
 ZHL-1209-d1d4car\_11Sep2005

**Frequency (MHz):**  
 (f1) 100.525  
**Original Points Count:**  
 (f1) 30135  
**Actual Points Count:**  
 (f1) 32768  
**Acquisition Time (sec):**  
 (f1) 1.1994  
**Spectral Width (ppm):**  
 (f1) 249.945  
**Pulse Program:**  
 Unknown  
**Temperature:**  
 29

**Number of Scans:**  
 2000

**Acq. Date:**  
 Sep 11 2005

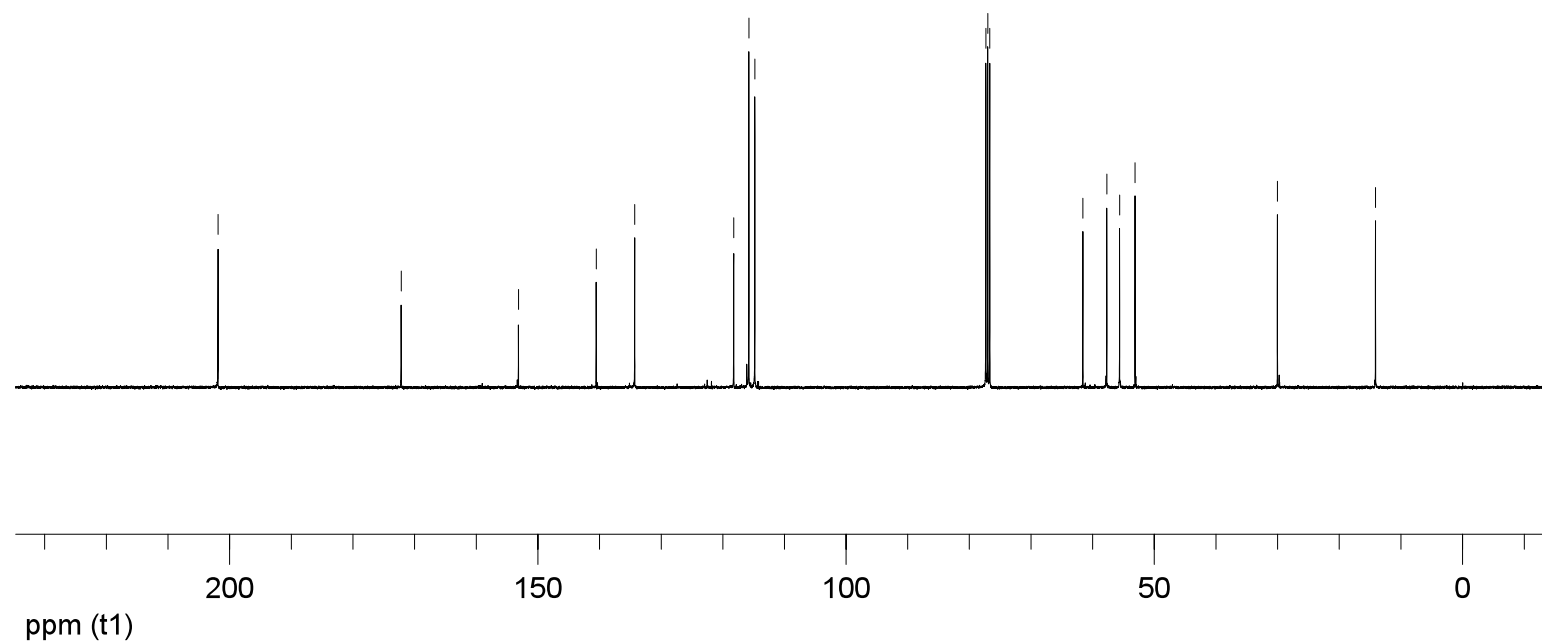

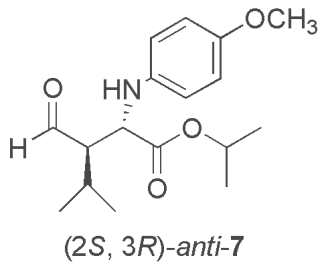

9.737  
9.728  
7.260  
6.772  
6.766  
6.756  
6.750  
6.671  
6.665  
6.655  
6.649  
5.049  
5.034  
5.018  
5.002  
4.987  
4.971  
4.955  
4.333  
4.313  
3.898  
3.733  
2.582  
2.573  
2.567  
2.562  
2.558  
2.553  
2.547  
2.538  
1.193  
1.177  
1.165  
1.149  
1.126

1.00

2.97

1.04

0.95

3.32

1.04

1.03

13.54

10.0

5.0

0.0

ppm (t1)

**Date:**  
21 Nov 2005  
**Document's Title:**  
ZHL-1287.mrc  
**Spectrum Title:**  
ZHL-1287-ipr\_19Nov2005

**Frequency (MHz):**  
(f1) 399.739  
**Original Points Count:**  
(f1) 23946  
**Actual Points Count:**  
(f1) 65536  
**Acquisition Time (sec):**  
(f1) 3.7440  
**Spectral Width (ppm):**  
(f1) 16.000  
**Pulse Program:**  
Unknown  
**Temperature:**  
29

**Number of Scans:**  
8

**Acq. Date:**  
Nov 19 2005

**Date:**  
21 Nov 2005  
**Document's Title:**  
ZHL-1284car.mrc  
**Spectrum Title:**  
ZHL-1284car\_18Nov2005

**Frequency (MHz):**  
(f1) 100.525  
**Original Points Count:**  
(f1) 30135  
**Actual Points Count:**  
(f1) 65536  
**Acquisition Time (sec):**  
(f1) 1.1994  
**Spectral Width (ppm):**  
(f1) 249.945  
**Pulse Program:**  
Unknown  
**Temperature:**  
29

**Number of Scans:**  
5000

**Acq. Date:**  
Nov 18 2005

S24

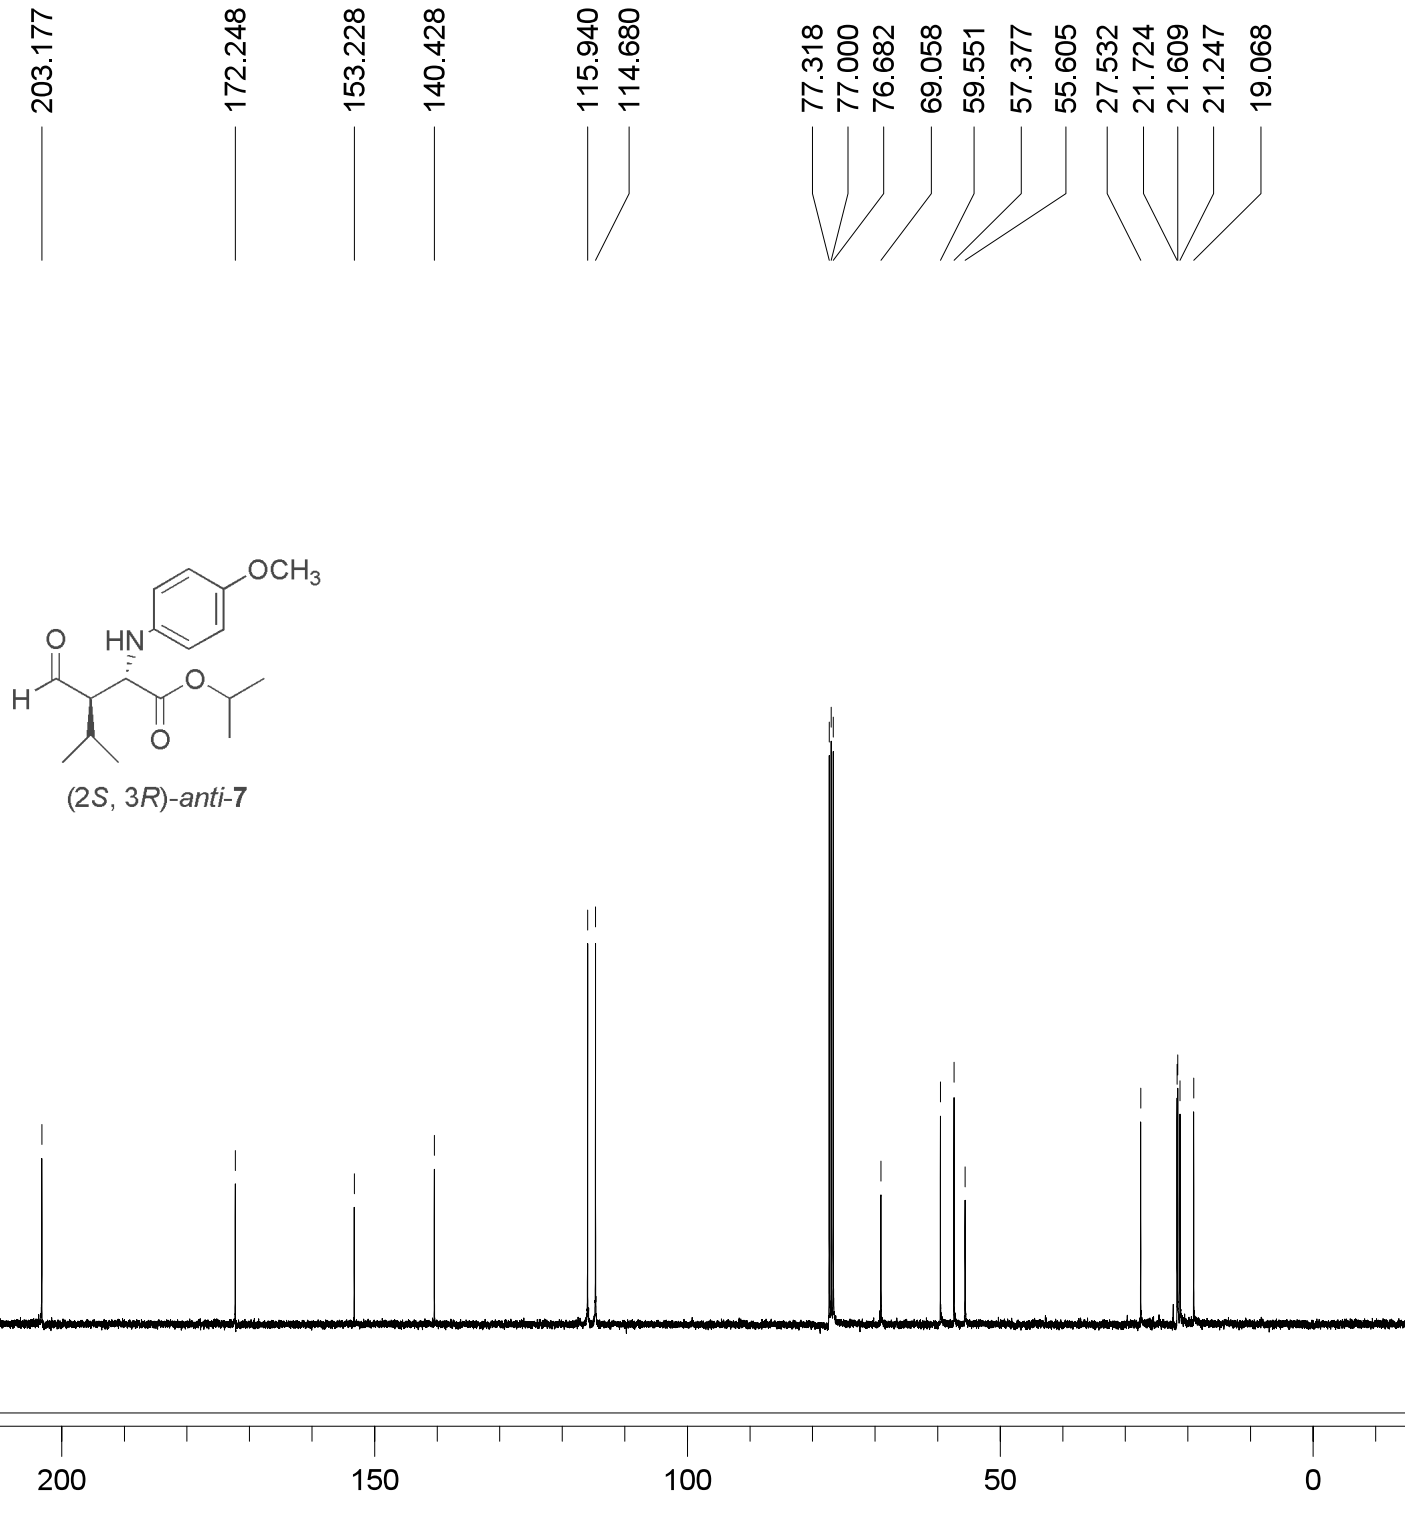



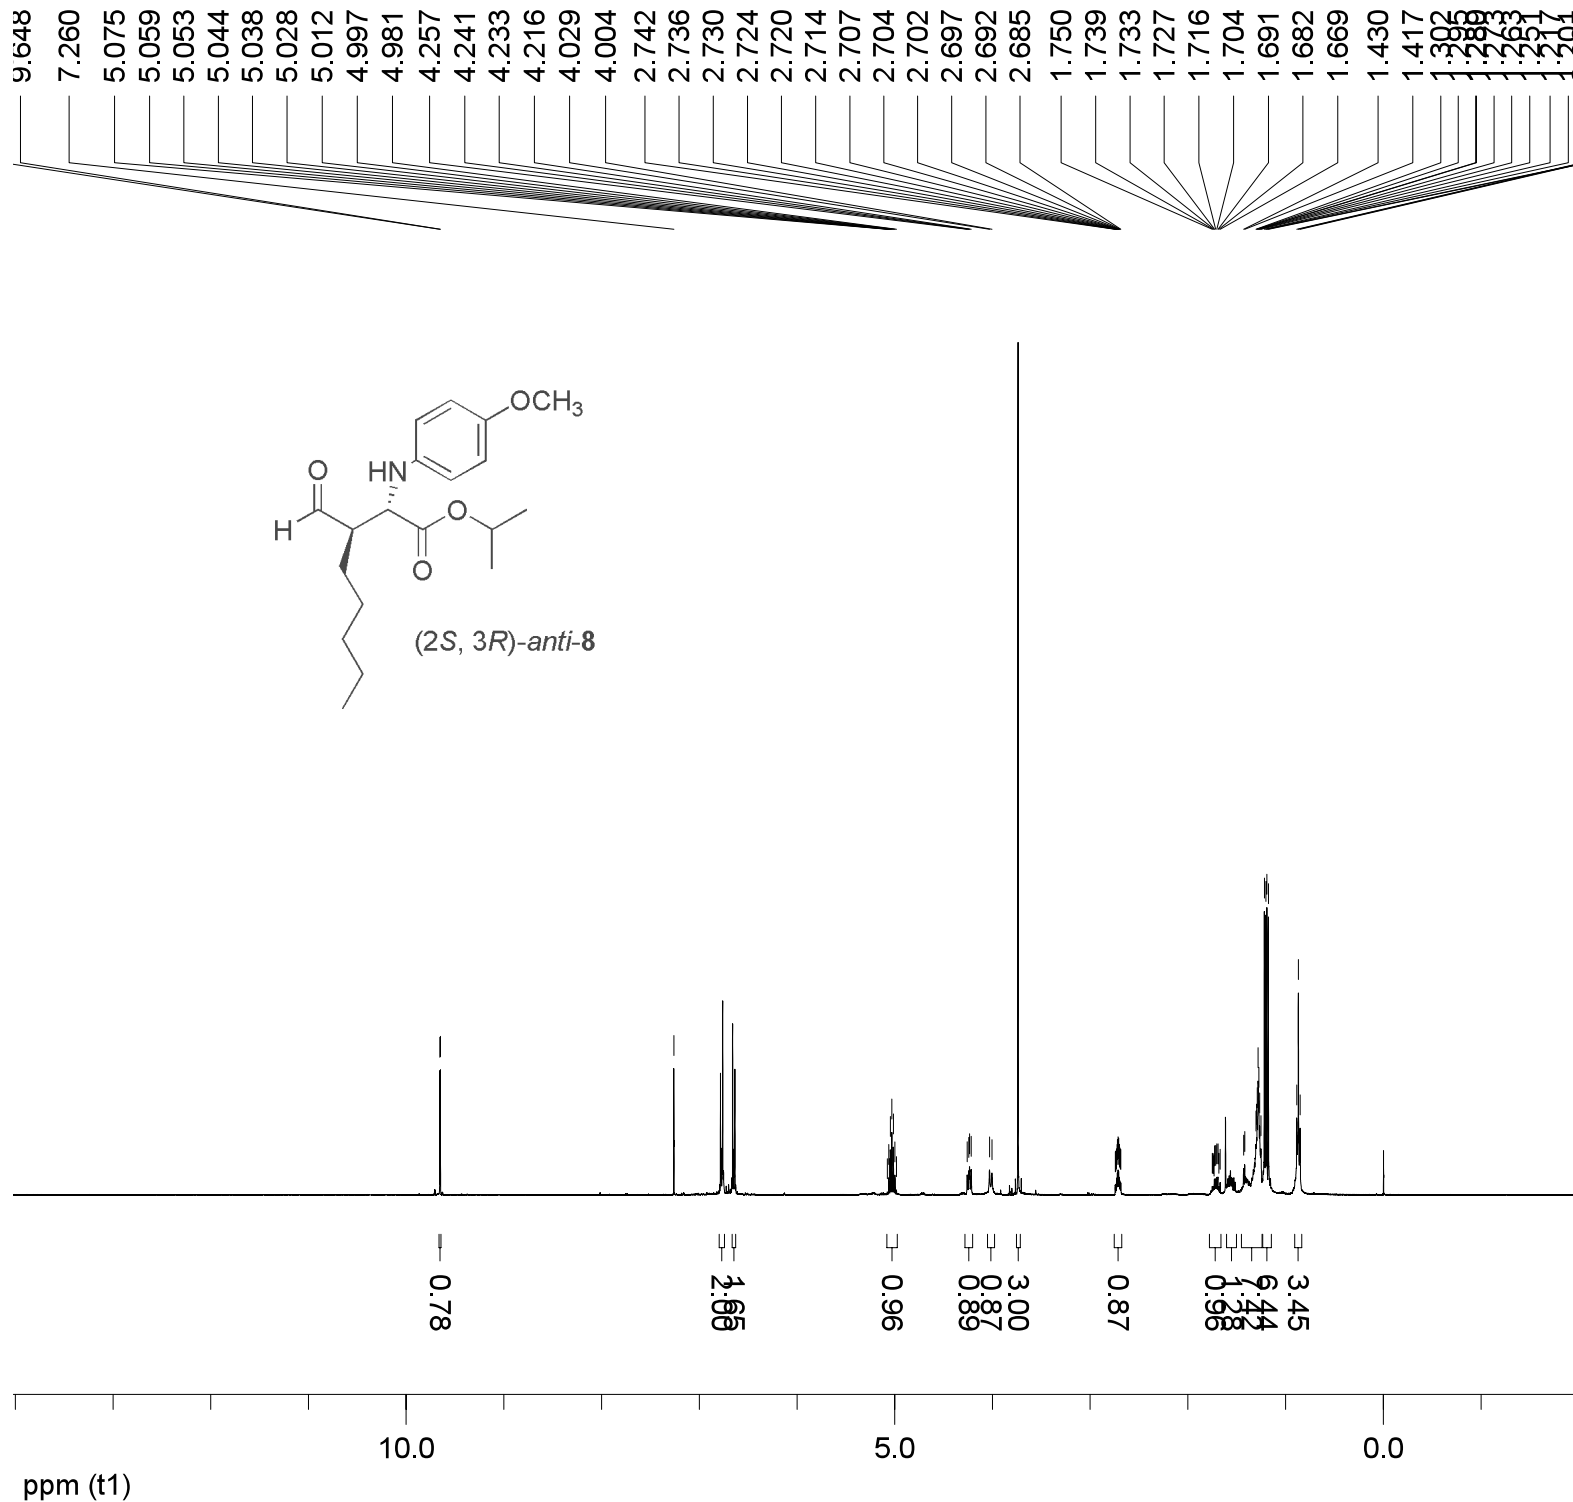

**Date:**  
21 Nov 2005

**Document's Title:**  
ZHL-1288-pent-H.mrc

**Spectrum Title:**  
ZHL-1287-pent\_19Nov2005

**Frequency (MHz):**  
(f1) 399.739

**Original Points Count:**  
(f1) 23946

**Actual Points Count:**  
(f1) 65536

**Acquisition Time (sec):**  
(f1) 3.7440

**Spectral Width (ppm):**  
(f1) 16.000

**Pulse Program:**  
Unknown

**Temperature:**  
29

**Number of Scans:**  
8

**Acq. Date:**  
Nov 19 2005

202.240

171.591

153.120

140.306

115.690

114.787

77.318

77.000

76.682

69.360

58.219

55.641

53.885

31.660

26.961

25.555

22.328

21.745

21.677

13.932

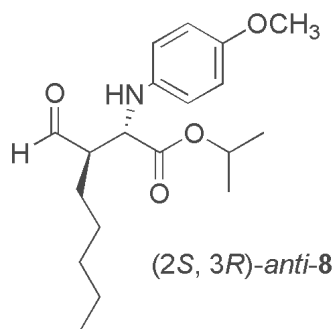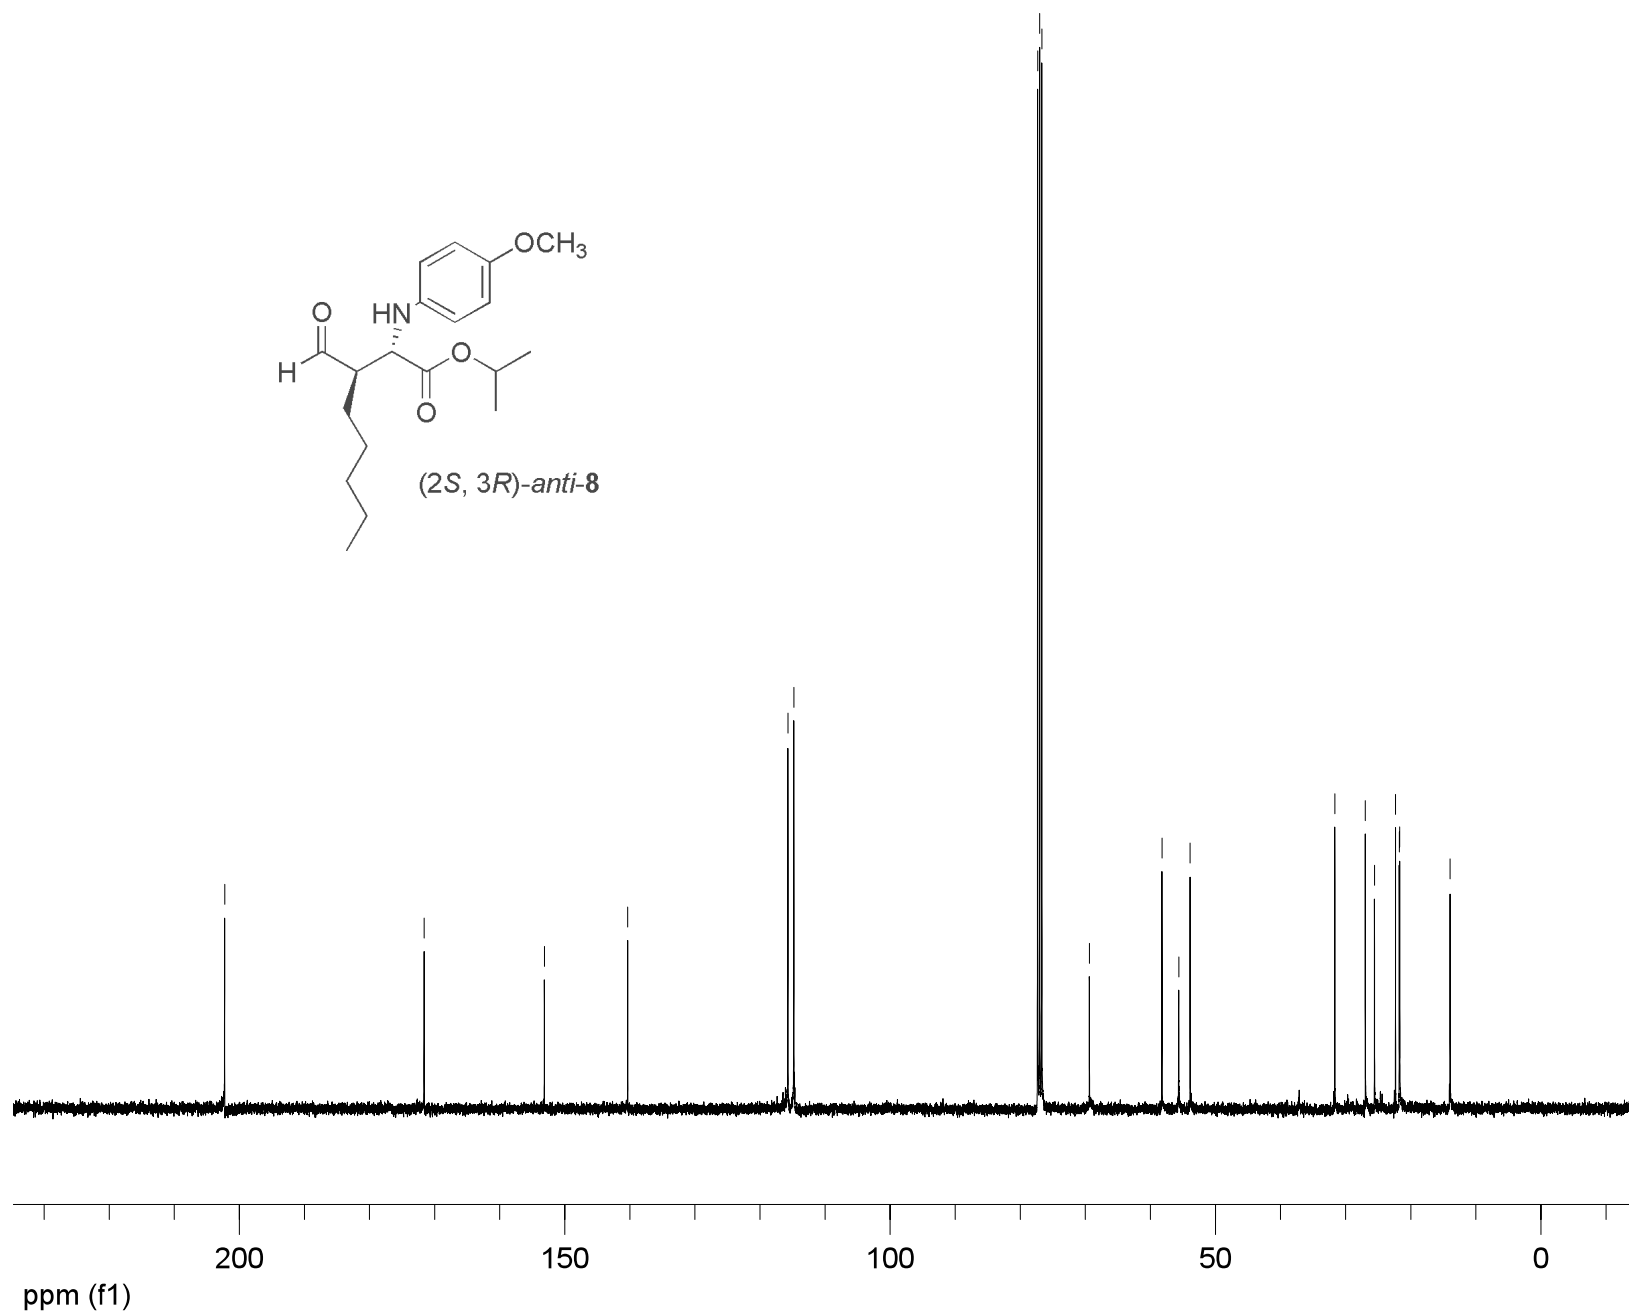

**Date:**

21 Nov 2005

**Document's Title:**

ZHL-1288-pentcar.mrc

**Spectrum Title:**

ZHL-1288car\_19Nov2005

**Frequency (MHz):**

(f1) 100.525

**Original Points Count:**

(f1) 30135

**Actual Points Count:**

(f1) 65536

**Acquisition Time (sec):**

(f1) 1.1994

**Spectral Width (ppm):**

(f1) 249.945

**Pulse Program:**

Unknown

**Temperature:**

29

**Number of Scans:**

2000

**Acq. Date:**

Nov 19 2005
